1 Antibiotic hypersensitivity signatures identify targets for attack in the *Acinetobacter baumannii*

2 cell envelope

3

4

5 Edward Geisinger,<sup>1,3,\*</sup> Nadav J. Mortman,<sup>1</sup> Yunfei Dai,<sup>3</sup> Murat Cokol,<sup>1,4</sup> Sapna Syal,<sup>1</sup> Andrew

6 Farinha,<sup>3</sup> Delaney Fisher,<sup>1</sup> Amy Tang,<sup>3</sup> David Lazinski,<sup>1</sup> Stephen Wood,<sup>2</sup> Jon Anthony,<sup>2</sup> Tim van

7 Opijnen,<sup>2</sup> Ralph R. Isberg<sup>1,\*</sup>

8

9 <sup>1</sup>Department of Molecular Biology and Microbiology, Tufts University School of Medicine,

10 Boston, Massachusetts, USA

11 <sup>2</sup>Department of Biology, Boston College, Chestnut Hill, Massachusetts, USA

12 <sup>3</sup>Department of Biology, Northeastern University, Boston, Massachusetts, USA

13 <sup>4</sup>Laboratory of Systems Pharmacology, Harvard Medical School, Boston, MA, USA.

14 \*Correspondence should be addressed to [ralph.isberg@tufts.edu](mailto:ralph.isberg@tufts.edu) or

15 [e.geisinger@northeastern.edu](mailto:e.geisinger@northeastern.edu).

16

17

18

19 **Abstract**

20 *Acinetobacter baumannii* is an opportunistic pathogen that is a critical, high-priority target for  
21 new antibiotic development. Clearing of *A. baumannii* requires relatively high doses of  
22 antibiotics across the spectrum, primarily due to its protective cell envelope. Many of the  
23 proteins that support envelope integrity and modulate drug action are uncharacterized, largely  
24 because there is an absence of orthologs for several proteins that perform essential envelope-  
25 associated processes, impeding progress on this front. To identify targets that can synergize with  
26 current antibiotics, we performed an exhaustive analysis of *A. baumannii* mutants causing  
27 hypersensitivity to a multitude of antibiotic treatments. By examining mutants with antibiotic  
28 hypersensitivity profiles that parallel mutations in proteins of known function, we show that the  
29 function of poorly annotated proteins can be predicted and used to identify candidate missing  
30 link proteins in essential *A. baumannii* processes. Using this strategy, we uncovered multiple  
31 uncharacterized proteins with critical roles in cell division or cell elongation, and revealed that a  
32 predicted cell wall D,D-endopeptidase has an unappreciated function in lipooligosaccharide  
33 synthesis. Moreover, we provide a genetic strategy that uses hypersensitivity signatures to  
34 predict drug synergies, allowing the identification of  $\beta$ -lactams that work cooperatively based on  
35 the cell wall assembly machineries that they preferentially target. These data reveal multiple  
36 pathways critical for envelope growth in *A. baumannii* that can be targeted in combination  
37 strategies for attacking the pathogen.

38

39

## 40 **Introduction**

41           The World Health Organization, Food and Drug Administration, and Centers for Disease  
42 Control each rank restriction of *Acinetobacter baumannii* as among the most critical targets for  
43 developing new antimicrobials<sup>1-3</sup>. This Gram-negative rod causes drug-resistant nosocomial  
44 diseases in the critically ill, commonly manifesting as bloodstream infections and ventilator-  
45 associated pneumonia<sup>4</sup>. Resistance to an extensive range of antibiotics, including formerly last-  
46 resort agents such as carbapenems, is now widespread among *Acinetobacter* isolates, with the  
47 emergence of strains resistant to virtually all available antibiotics<sup>5,6</sup>. Few therapeutic options  
48 remain to control this threat.

49           A better understanding of what makes *A. baumannii* so difficult to treat is critical for  
50 improved strategies that attack the pathogen. The evolution of drug resistance in *A. baumannii* in  
51 large part is due to acquisition of inactivating enzymes or drug target mutations blocking  
52 antibiotic lethal action<sup>7,8</sup>. These acquired alterations, which vary across isolates, act in concert  
53 with conserved mechanisms tightly linked to reduced drug penetration, including a low-  
54 permeability cell envelope and upregulation of efflux pumps<sup>9,10</sup>. Insight into the intrinsic  
55 envelope-level defenses has the potential to inform ways to enhance antibiotic killing across  
56 diverse isolates.

57           A powerful approach to revealing the genetic contributions to intrinsic mechanisms of  
58 drug defense is via high-density knockout mutant libraries, which allow measurement of  
59 genotype-phenotype relationships on a genome-wide scale<sup>11,12</sup>. This approach has been used to  
60 identify genes modulating susceptibility to a variety of antibiotic stresses<sup>13-18</sup>, and has been used  
61 to identify intrinsic defenses against a selection of antimicrobial treatments in *A. baumannii*<sup>9,19,20</sup>.  
62 Despite the utility of these approaches in measuring gene-antibiotic interactions, understanding

63 the mechanisms behind the uncovered resistance determinants is limited by difficulties  
64 associated with providing accurate gene annotations. A large fraction of genes in any organism  
65 lack characterization and have no known or predicted function (referred to as “orphan” or  
66 “hypothetical” genes)<sup>13,21,22</sup>. Lack of functional information complicates downstream analyses,  
67 and single gene-antibiotic phenotypes can be insufficient to generate hypotheses on function.  
68 Moreover, in species divergent from model organisms, functional annotations predicted by  
69 sequence homologies are often inaccurate, as the function of sequence orthologs may not be  
70 conserved<sup>22,23</sup>. Hypothetical genes lacking annotation and genes with inaccurate annotation due  
71 to noncanonical functions are predicted to be particularly problematic with *Acinetobacter*, which  
72 has diverged from other  $\gamma$ -proteobacteria and lacks many canonical proteins that function in  
73 envelope biogenesis<sup>10,24</sup>.

74 In this paper, we have comprehensively characterized mechanisms of intrinsic defense in  
75 *A. baumannii* against multiple antibiotics via transposon sequencing (Tn-seq) and leveraged the  
76 diversity of phenotypes generated to address the problem of uncharacterized gene function in this  
77 pathogen. By analyzing the patterns of antibiotic hypersusceptibility caused by gene-inactivating  
78 mutations across the genome, we uncovered new functions for conserved hypothetical proteins  
79 and expanded the roles of annotated enzymes in envelope synthesis. The identified determinants  
80 of susceptibility represent novel targets for potentiating current antibiotics against *A. baumannii*.  
81 Moreover, the Tn-seq analysis informed a strategy to combine different classes of  $\beta$ -lactam  
82 antibiotics for enhanced antimicrobial activity.

83

84

## 85 **Results**

### 86 **Defining intrinsic drug susceptibility determinants in *Acinetobacter baumannii*.**

87           To examine the genome-wide molecular mechanisms that modulate antibiotic action in *A.*  
88 *baumannii*, we measured the effects of transposon insertion mutations on bacterial growth during  
89 challenge with a broad set of antimicrobial compounds. Antibiotics were selected that target a  
90 variety of essential cellular processes, with about half of the treatments targeting the cell  
91 envelope (Fig. 1). This subset includes antibiotics that target distinct aspects of cell wall  
92 biogenesis governing elongation or division (Fig. 1). In addition to defining elements of intrinsic  
93 drug susceptibility, the use of multiple distinct stress conditions facilitates the determination of  
94 specific fitness phenotypes for a large swath of genes in *A. baumannii*. The relatedness of these  
95 fitness profiles is predicted to provide leads regarding the function of uncharacterized proteins  
96 that contribute to drug resistance.

97           To measure the effect of each antibiotic on relative fitness of transposon mutants, we  
98 used previously constructed random banks of *A. baumannii* ATCC 17978 Tn10 insertion  
99 mutants<sup>20</sup> as well as random banks of *Himar1* Mariner mutants constructed for these purposes  
100 (Materials and Methods, Supplementary Table 1). For each transposon, 10 independent insertion  
101 pools, each consisting of 5,000 - 20,000 unique mutants (>60,000 mutants in total with Tn10,  
102 >85,000 mutants with Mariner), were cultured in rich broth in the presence or absence of  
103 antibiotic. Antibiotics were used at sub-minimal inhibitory concentrations (MIC) that lowered  
104 the growth rate by 20-30% compared to growth without antibiotics, using conditions in which  
105 the bulk population grew approximately 8 generations (Supplementary Table 1). Based on our  
106 previous studies with ciprofloxacin (CIP), this degree of selective pressure enables detection of  
107 mutants with altered susceptibilities<sup>20</sup>. In the case of sulbactam (SLB), an important component

108 of empiric antibiotic therapy for *A. baumannii* infections, we tested an additional, lower  
109 concentration resulting in 10-15% growth inhibition that should detect only the strongest  
110 elements of intrinsic resistance to the drug. DNA was isolated from samples taken immediately  
111 before ( $t_1$ ) and after ( $t_2$ ) the 8 doublings, and transposon insertion sites were PCR-amplified and  
112 enumerated by massively parallel sequencing. Read counts mapping to the chromosome and  
113 plasmid pAB3 were used to calculate a normalized value of the fitness of each transposon mutant  
114 relative to the entire pool using established methods<sup>20</sup>. Fitness data across all pools from  
115 individual mutants mapping to the same gene were then aggregated to assess the contribution of  
116 each to antibiotic-specific growth.

117         The population-wide Tn-seq fitness method incorporates information from multiple  
118 points in growth, so the effects of chromosome position bias observed previously<sup>25</sup> are largely  
119 negated. An exception was the aminoglycoside tobramycin (TOB), which caused chromosome  
120 origin-proximal genes to show higher average fitness scores than those of terminus-proximal  
121 genes (Supplementary Fig. 1). To eliminate position bias, fitness values from the TOB treatment  
122 were normalized by fitting to a locally weighted scatterplot smoothing (LOWESS) curve. The  
123 other case of position bias was seen with the fluoroquinolone levofloxacin (LEV), but fitness  
124 values were associated with the region of two prophages (Supplementary Fig. 1, red  
125 arrowheads). We demonstrated previously that these increases are associated with a DNA gyrase  
126 block in a fluoroquinolone-sensitive background, and the LEV data here mimic the position-  
127 specific fitness data observed previously with CIP<sup>20</sup>.

128         From the gene-level Tn-seq fitness data determined with each condition (Supplementary  
129 Data 1), we identified transposon mutations that altered antibiotic susceptibility. Such mutations  
130 were defined as those that resulted in significantly lower or higher fitness during antibiotic

131 challenge compared to the untreated control (fitness difference, or  $W_{diff}$ ), using previously  
132 described criteria<sup>20</sup> (Materials and Methods). When considering all 20 antibiotic stress  
133 conditions, including previously described data with 2 doses of CIP<sup>20</sup>, 327 genes showed  
134 significant fitness differences with at least one antibiotic condition (Supplementary Fig. 2, blue  
135 data points; Supplementary Data 2). Transposon mutations in 10 of these genes caused  
136 significant fitness change with at least half of the 20 antibiotic conditions (Supplementary Table  
137 2), indicating that these genes are associated with the ability of *A. baumannii* to cope with a  
138 broad range of stresses. Among the 10 genes are known determinants of multidrug defense  
139 including each component of the AdeIJK multidrug efflux system<sup>26</sup>, and the BfmR envelope  
140 regulator that we have previously shown modulates survival after antibiotic exposure<sup>27</sup>.  
141 Additional candidate broad susceptibility determinants controlling envelope-level processes  
142 included the putative periplasmic protease CtpA<sup>20,27</sup>, lipooligosaccharide (LOS) synthesis  
143 enzymes LpsB and LpxL<sup>28,29</sup>, and BlhA, a protein of unknown function involved in cell  
144 division<sup>20,30</sup>. An uncharacterized gene present in plasmid pAB3 (ACX60\_RS18565) was also  
145 detected as modulating defense against several antibiotics.

146

### 147 **Correlation of drug susceptibility signatures reflects functional connections between gene** 148 **products.**

149 We predicted that altered susceptibilities to antibiotics could be used to identify  
150 functional relationships among *A. baumannii* proteins. To this end, we defined a phenotypic  
151 signature for each gene by compiling the average fitness values of its transposon mutants from  
152 all tested conditions<sup>13</sup>. The phenotypic signatures were generated by the 20 antibiotic stress  
153 conditions and 12 untreated control conditions (Supplementary Data 1). To maximize analysis of

154 variation across conditions, fitness values were scaled such that they represented the change from  
155 mean fitness in standard deviation units (z-scores).

156         The data analyzed in this fashion indicate that drug susceptibility phenotypic signatures  
157 can effectively identify gene relationships. First, sets of annotated genes whose products  
158 physically interact or perform functions within a shared pathway show phenotypic signatures that  
159 are highly correlated (Fig 2a, genes not marked by arrowheads). For example, Tn-seq fitness  
160 profiles were significantly correlated for proteins that are associated with either cell wall  
161 recycling<sup>31</sup> ( $r = 0.45 - 0.95$ ,  $p < 0.009$ ), periplasmic proteolysis<sup>32</sup> ( $r = 0.58 - 0.98$ ,  $p < 0.0006$ ), or  
162 the AdeIJK multidrug efflux system<sup>26</sup> ( $r = 0.96 - 0.98$ ,  $p < 10^{-17}$ ) (Fig 2a). Additionally, nearly all  
163 enzymes involved in DNA recombination and repair<sup>20</sup> (except for some pairings with *recG*) had  
164 significantly correlated signatures ( $r = 0.46 - 0.9$ ,  $p < 0.009$ ), as did 5 components of the MLA  
165 outer membrane (OM) lipid transport system<sup>33,34</sup> (MlaA and MlaC-F) ( $r \geq 0.69$ ,  $p < 0.0001$ ). The  
166 one exception to the latter was *m1aB* ( $r = -0.01$  to  $-0.21$ ,  $p > 0.23$ ), but *E. coli* mutations in this  
167 gene are weak compared to mutations in other *m1a* genes<sup>34</sup>. Second, genes with opposing  
168 activities show anticorrelated phenotypic signatures. For example, the phenotypic signature of  
169 the regulator *adeN* is highly anticorrelated with the *adelJK* signatures, consistent with the  
170 regulator negatively controlling this operon<sup>26</sup> ( $r = -0.80$  to  $-0.77$ ,  $p < 10^{-6}$ ). A similar pattern was  
171 seen with genes associated with phosphate homeostasis. In many bacteria, the two-component  
172 system PhoBR transcriptionally regulates phosphate-acquisition in response to signals from the  
173 phosphate-sensing PstSCAB-PhoU complex<sup>35</sup>. Mutations in one system result in opposite effects  
174 on gene expression in the other in *E. coli*<sup>35</sup>. The phenotypic signatures of the transposon  
175 mutations in *A. baumannii* significantly correlated within each system (PhoBR,  $r = 0.91$ ,  $p < 10^{-$   
176 <sup>11</sup>; PstSCAB-PhoU,  $r = 0.4 - 0.81$ ,  $p < 0.024$ ) while between the two systems they anticorrelated



177 (r = -0.42 to -0.62, p < 0.017) (Fig. 2a). Therefore, we expect that antibiotic-gene phenotypic  
178 signatures reflect underlying physical or functional connectivity, allowing new leads on gene  
179 function in *A. baumannii*.

180 As an initial test of this hypothesis, we performed hierarchical clustering of genome-wide  
181 phenotypic signatures to identify additional genes that correlate with the pathways highlighted in  
182 Fig. 2a. Analysis of these pathways allowed identification of several co-clustering genes that had  
183 poor or no functional annotations (Fig. 2a, genes marked with arrowheads). For example, two  
184 hypothetical genes encoding a DUF4175 domain of unknown function (ACX60\_RS00475) or a  
185 structural maintenance of chromosomes domain (SMC\_prok\_B; ACX60\_RS13190)<sup>36</sup>, as well as  
186 *blhA* clustered with DNA recombination and repair signatures. These three genes showed  
187 particularly high correlation with *polA* and with one another (r = 0.71 - 0.94, p < 10<sup>-5</sup>), forming a  
188 sub-cluster defined by hypersensitivity to both fluoroquinolone and β-lactam antibiotics (Fig. 2a,  
189 dotted green box). An uncharacterized protein (ACX60\_RS00705) with a Phenol\_MetA\_deg  
190 domain, which is part of a family of OM channel domains implicated in hydrophobic molecule  
191 uptake<sup>37,38</sup>, had a phenotypic signature correlating strongly with those of MlaA,C,D,E and F (r =  
192 0.69 - 0.92, p < 10<sup>-4</sup>) consistent with this being an uncharacterized and potentially essential  
193 member of the Mla complex.

194 Encouraged by these results, we applied the same analysis to the other pathways. A  
195 protein with a predicted periplasmic peptidase domain (ACX60\_RS14880) clustered with the *A.*  
196 *baumannii* orthologs of periplasmic proteases CtpA, Prc, and the CtpA binding partner LbcA<sup>32</sup> (r  
197 = 0.51 - 0.80, p < 0.004). A predicted PitA-family phosphate transporter (ACX60\_RS13510) was  
198 highly correlated with PhoBR (r = 0.70 - 0.71, p < 10<sup>-5</sup>), while a Ribonuclease D ortholog (*rnd*)  
199 was found to cluster with PstSCAB-PhoU (r = 0.46 - 0.72, p < 0.02). In addition, one of two

200 MurI paralogs in *A. baumannii*<sup>39,40</sup> had a phenotypic signature connected to PG recycling  
201 (*murI<sub>Ab1</sub>*,  $r = 0.52 - 0.79$ ,  $p < 0.003$ ; Fig. 2a). Finally, hierarchical clustering identified mutations  
202 that match the phenotypic signature of the pAB3-encoded broad antibiotic susceptibility  
203 determinant ACX60\_RS18565 (Fig. 2b). These included mutants mapping to the *relA* ppGpp  
204 synthetase and to an ortholog of the *bpt* leucine aminoacyl protein transferase involved in N-end-  
205 rule degradation<sup>41,42</sup> ( $r = 0.72 - 0.87$ ,  $p < 10^{-5}$ ). Together, these results illustrate the ability of  
206 antibiotic sensitivity changes to identify functions of poorly characterized genes based on  
207 phenotypic signatures.

208

209 **ACX60\_RS00475 (AdvA) is an essential protein critical to cell division in *A. baumannii*.**

210 The cluster analysis showing close relationships between ACX60\_RS00475 and genes  
211 associated with chromosome replication/segregation and cell division (Fig. 2a, subcluster boxed  
212 in green) predicted a related function for this uncharacterized protein in *A. baumannii*. We  
213 reasoned that the concerted hypersensitivity to agents that damage DNA or the cell wall in these  
214 mutants may reflect the consequences of defects in coordination of cell division and DNA  
215 replication. As the pathogen lacks orthologs of several canonical proteins controlling the cell  
216 cycle and cell division (FtsE and FtsX, and Z-ring modulators ZapB, SlmA, and SulA)<sup>24</sup>, we  
217 hypothesized that poorly annotated genes encode proteins that perform functions substituting for  
218 these missing components. Based on the cluster analysis and the results described below, we  
219 propose that ACX60\_RS00475 is one such protein that could act as a missing link and have  
220 renamed the gene *advA* (antibiotic susceptibility and division protein of Acinetobacter).

221 To show that mutations in *advA* and *blhA* generate the pattern of selective  
222 hypersensitivity to fluoroquinolones and  $\beta$ -lactams predicted for this cluster, we constructed in-

223 frame deletions and tested the resulting mutants for growth in broth medium containing  
224 antibiotics at concentrations below the MIC determined for WT. The  $\Delta blhA$  mutant had  
225 substantial growth defects during challenge with CIP and several  $\beta$ -lactams, but not rifampicin  
226 (RIF) (Fig. 3b, blue symbols), in agreement with the effects of transposon insertions in this gene  
227 (Fig. 3a)<sup>30</sup>. A deletion of *advA*, however, could not be isolated in the absence of a second copy of  
228 the gene. Analysis of the location of transposon insertions in *advA* within our Tn-seq banks  
229 revealed that they mapped exclusively to a single region corresponding to residues 203-238,  
230 downstream of the DUF4175 domain and two predicted TM helices, in both Tn10 (Fig 3a) or  
231 Mariner pools (Supplementary Fig. 3). These results are consistent with an essential function for  
232 *advA*, with only a small subset of transposon insertions in the gene yielding hypomorphic  
233 mutants with detectable fitness.

234 To examine *advA*-associated phenotypes, targeted deletions were isolated in the presence  
235 of a complementing DNA fragment (Materials and Methods). We used two plasmids for this  
236 purpose. The first was a derivative of the R1162 $rep^{\text{ts}}$  Kan<sup>R</sup> plasmid pMS88<sup>43</sup> containing a  
237 constitutive *advA*. This low copy plasmid shows instability at 42°C in *E. coli*<sup>43</sup> and, as described  
238 below, is also unstable in *A. baumannii* grown at 37°C. The second plasmid was a derivative of  
239 pEGE305<sup>27</sup> in which the inducible *lacI<sup>q</sup>-T5lacP* module controls expression of an *advA-gfp*  
240 translational fusion. We found that  $\Delta advA$  cells harboring pMS88-*advA* could not be cured of the  
241 plasmid, consistent with essentiality of this gene. To measure efficiency of curing, the strain was  
242 re-streaked from LB agar plates with kanamycin onto drug-free LB agar, and after overnight  
243 growth at 37°C, 100% of the colonies from the  $\Delta advA$ /pMS88-*advA* strain retained the plasmid  
244 (18/18 retaining Kan<sup>R</sup>). In contrast, pMS88 was lost from a large fraction of the WT control  
245 strain cultured in parallel (6/18 colonies retaining Kan<sup>R</sup>). In addition, the  $\Delta advA$ /pMS88-*advA*

246 strain showed reduced colony size (Fig. 3d) and delayed growth in liquid medium (Fig. 3b, green  
247 vs black circles) at 37°C compared to WT. Second,  $\Delta advA$  harboring  $T5lacP::advA-gfp$  required  
248 IPTG induction for colony formation (Fig. 3d) and for growth after passage in broth (Fig. 3f).  
249 These findings indicate that AdvA is essential for *A. baumannii* growth.

250 Strikingly, reducing AdvA levels modulated antibiotic susceptibility in the pattern  
251 predicted by its phenotypic signature. The  $\Delta advA/pMS88-advA$  strain cultured at 37°C showed  
252 selective antibiotic hypersensitivities matching that of  $\Delta blhA$  (Fig 3b, green symbols). The  
253 presence of pMS88 in WT did not affect growth with the same concentrations of fluoroquinolone  
254 or  $\beta$ -lactam antibiotics (Supplementary Fig. 3). Moreover, although  $\Delta advA/T5lacP::advA-gfp$   
255 could reach saturation in broth medium with minimal amounts of inducer (5  $\mu$ M IPTG) in the  
256 absence of antibiotics, addition of sub-MIC levels of CIP, SLB, and MER caused substantial  
257 growth defects compared to WT, consistent with the Tn-seq results (Fig. 3g). Increasing the  
258 inducer level to 125  $\mu$ M enhanced growth with each antibiotic, although CIP susceptibility was  
259 still below that of WT (Fig. 3g). In further support of a role in cell division, both the  
260  $\Delta advA/pMS88-advA$  strain and  $\Delta advA/T5lacP::advA-gfp$  after removal of inducer had  
261 pronounced filamentous morphologies (Fig. 3h,i). As predicted by this functional analysis, the  
262 AdvA-GFP hybrid localized to mid-cell at sites of ongoing cell division (Fig. 3j). These results  
263 together support the predictions of the Tn-seq cluster analysis that *advA* functions in cell division  
264 in *A. baumannii* and is a newly identified target for antibiotic hypersensitivity.

265

266 **Phenotypic signatures identify a role for a cell-wall hydrolysis enzyme in synthesis of *A.***  
267 ***baumannii* LOS.**

268 We explored the Tn-seq dataset further to identify phenotypic signatures that predict  
269 functions that contribute to cell envelope integrity and biogenesis, taking advantage of the  
270 diverse types of antibiotic treatments utilized in our screen. We focused first on antibiotics  
271 whose action is modulated by OM integrity. The OM impedes the uptake of bulky, hydrophobic  
272 antibiotics such as RIF and azithromycin (AZITH), while the OM lipid A component is the target  
273 of the amphipathic polymyxins colistin (COL) and polymyxin B (PB)<sup>44</sup>. We predicted that  
274 phenotypic signatures defined by hypersusceptibility to these antibiotics would identify proteins  
275 that contribute to OM integrity in *A. baumannii*. Principal component analysis (PCA) (Materials  
276 and Methods), therefore, was used to identify a set of genes with susceptibility signatures  
277 showing dramatic fitness changes as a function of antibiotic hydrophobicity.

278 By performing PCA analysis and hierarchical clustering, the resulting signatures could be  
279 divided into 2 general groups based on whether hydrophobic (group 1) or amphipathic character  
280 (group 2) was more tightly associated with susceptibility (Fig. 4a, dashed boxes).  
281 Hypersensitivity to hydrophobic antibiotics was associated with mutation in *bfmR*, which  
282 controls transcription of genes involved in OM synthesis<sup>27</sup> as well as in three additional genes  
283 with highly correlated phenotypic signatures—*lpsB*, *lpxL<sub>Ab</sub>*, and *pbpG* (group 1, Fig. 4a,  $r = 0.74$ -  
284  $0.82$ ,  $p < 10^{-5}$ ). *LpsB* is a conserved glycosyltransferase critical for LOS core construction.  
285 Mutants lacking *lpsB* express a deeply truncated LPS molecule<sup>29</sup>. *LpxL<sub>Ab</sub>* is an acetyltransferase  
286 responsible for addition of a lauroyl acyl chain to lipid A<sup>28</sup>. *pbpG* encodes an ortholog of *E. coli*  
287 PBP7/8, a cell wall D,D-endopeptidase. *A. baumannii* transposon mutants bearing *pbpG*  
288 mutations are attenuated in animal infection models and are complement sensitive<sup>45</sup>, although the  
289 contribution of this enzyme to envelope biogenesis is unclear. Group 2 discriminating mutants,  
290 showing preferential hypersensitivity to the amphipathic polymyxin drugs, are largely found in

291 genes that encode proteins involved in outer-core (OC) and capsule (K)-loci biogenesis<sup>46-48</sup> (Fig.  
292 4a). Deletion of one of these genes, *itrA*, was shown to cause selective hypersensitivity to COL  
293 but not RIF<sup>49</sup>, in agreement with its Tn-seq fitness values. Interestingly, group 2 also included a  
294 cell wall synthesis enzyme—the bifunctional transpeptidase/transglycosylase PBP1B (Fig. 4a).  
295 Clusters of signatures, therefore, indicate that loss of a subset of peptidoglycan (PG) synthesis  
296 enzymes and surface carbohydrate synthesis pathways results in selective hypersensitivity to  
297 hydrophobic or amphipathic antibiotics.

298 To validate these selective changes in antimicrobial susceptibility, we analyzed the  
299 effects of targeted, in-frame deletions on growth in the presence of antibiotics (Supplementary  
300 Table 1). The  $\Delta pbpG$  mutant showed severe defects with RIF and AZITH, partial defects with  
301 COL and PB, and no defect with the  $\beta$ -lactam antibiotics mecillinam (MEC), aztreonam (AZT),  
302 and SLB, consistent with its placement in group 1 (Fig. 4c). In contrast,  $\Delta pbp1B$ , showed severe  
303 defects with COL and PB, a partial defect with RIF, and no defect with AZITH or SLB,  
304 consistent with its placement in group 2 (Fig. 4b,d). Interestingly, although it shows similarity to  
305 PBP1A which is connected to tolerance of OM defects in *A. baumannii*<sup>50</sup>, the phenotypic  
306 signature of *pbp1A* mutations did not strongly correlate with those of *pbp1B* ( $r = -0.024$ ,  $p = 0.9$ ),  
307 and *pbp1A* mutant bacteria showed no enhanced susceptibility to COL or PB (Supplementary  
308 Fig. 4). The role played by *pbpG* in antibiotic resistance was also evaluated in a second *A.*  
309 *baumannii* isolate characterized by multidrug-resistance, AB5075. Two separate AB5075  
310 mutants with different transposon insertions in *pbpG* each showed pronounced growth defects  
311 with RIF and AZITH, as well as reduced growth with COL (Supplementary Fig. 4), similar to  
312 the corresponding phenotypes in ATCC 17978. Sensitivity to vancomycin (VAN), another  
313 antibiotic blocked by the OM, was also increased. In contrast to the situation with ATCC 17978,

314 *pbpG* knockout in AB5075 also enhanced susceptibility to SLB (Supplementary Fig. 4).  
315 Therefore, while defense against hydrophobic/bulky and amphipathic antibiotics is a conserved  
316 feature linked to *pbpG*, the overall genotype may modulate its relative resistance to other forms  
317 of stress.

318         Given the highly similar pattern of drug sensitivity caused by *pbpG* and LOS core  
319 mutations, we examined their connection to maintenance of the OM permeability barrier by  
320 comparing the contribution of *pbpG* and LOS synthesis genes to SDS resistance. While WT *A.*  
321 *baumannii* grew efficiently on solid medium containing up to 0.1% SDS,  $\Delta pbpG$  had a  
322 pronounced SDS defect and formed colonies only at concentrations of 0.00625% or lower,  
323 mimicking the phenotype of  $\Delta lpsB$  (Fig. 4e). By contrast, deletion of *lpxL<sub>Ab</sub>* produced a subtle  
324 defect only evident at a high SDS concentration (Fig. 4e). Deficiencies in the two co-clustering  
325 LOS core synthesis proteins thus have vastly different consequences for the OM barrier,  
326 consistent with their distinct biochemical activities differentially altering LOS  
327 hydrophobicity<sup>28,29</sup>. Reintroduction of cloned *pbpG* in the  $\Delta pbpG$  mutant restored both RIF and  
328 SDS susceptibility to WT levels (Fig. 4f). Therefore, the matching hypersensitivity phenotypes  
329 caused by knockout of *lpsB* and *pbpG* may reflect related defects in LOS biogenesis.

330         Analysis of LOS in strains harboring deletions of *pbpG*, *lpsB*, and/or *lpxL<sub>Ab</sub>* revealed  
331 strain-specific defects that show certain common features. Whole-cell lysates from each strain  
332 were separated by SDS-PAGE and LOS was detected by carbohydrate-specific staining. SDS-  
333 PAGE gels were also stained with Coomassie Blue to allow normalization of samples by total  
334 protein content (Materials and Methods). Consistent with previous observations<sup>29,49</sup>, WT *A.*  
335 *baumannii* LOS was heterogenous with several distinct co-migrating bands ranging from  
336 approximately 2 to 10 kDa (Fig. 4g and Supplementary Fig. 4). The LOS banding pattern was

337 not affected by removal of proteins with proteinase K digestion (Supplementary Fig. 4). LOS  
338 bands were grouped into 3 sets that we termed “full,” “intermediate,” and “minimal” based on  
339 the hypothesis that degree of glycosylation is a major determinant of band heterogeneity. As  
340 expected, the  $\Delta lpsB$  mutant showed an altered banding pattern defined by loss of full-length LOS  
341 and accumulation of intermediate forms (Fig. 4g,h). This mutant also had a substantial reduction  
342 in the level of the minimal LOS glycolipid (Fig. 4g,h).  $lpxL_{Ab}$  deletion had a much more subtle  
343 effect on LOS banding pattern, with apparent consolidation of some full-length and intermediate  
344 bands (Fig. 4g,h). Deletion of  $pbpG$  resulted in an LOS band pattern appearing similar to WT,  
345 but the levels of both full-length and minimal bands were clearly decreased (Fig. 4g,h). The  
346  $\Delta pbpG$  and  $\Delta lpsB$  mutants each showed approximately 40-50% reduction in overall LOS levels  
347 compared to WT, in contrast with  $\Delta lpxL_{Ab}$  which did not cause overall LOS levels to be  
348 significantly altered. Consistent with the different hypersensitivity signatures that separated  
349  $pbp1B$  mutants from the group 1 cluster,  $pbp1B$  deletion did not result in appreciable changes in  
350 LOS production (Supplementary Fig. 4). The reductions in LOS levels observed with  $pbpG$  and  
351  $lpsB$  mutation, which may be the driver of their highly similar hypersensitivity phenotypes,  
352 reveal an unappreciated connection between cell wall and OM biogenesis in *A. baumannii*.

353

354 **Differential susceptibility to inhibition of cell wall synthesis systems identifies novel**  
355 **determinants of rod shape.**

356 The ability of antibiotics to specifically target distinct aspects of cell wall growth in the  
357 Tn-seq screen allowed us to identify new determinants of envelope biogenesis in *A. baumannii*.  
358 Cell wall biosynthesis in rod-shaped bacteria is largely governed by two multiprotein  
359 machineries, the divisome and the Rod system<sup>51</sup>. The divisome builds the PG at the division



360 septum and periseptal regions, while the Rod system dictates PG growth along most of the long-  
361 axis of elongating bacteria<sup>51</sup>. Different  $\beta$ -lactams typically have distinct affinities for  
362 transpeptidase enzymes belonging to each machinery, allowing for signature morphological  
363 consequences upon drug exposure. For instance, at the sub-MIC doses used in our screen, SLB,  
364 AZT, and ceftazidime (CEF) caused *A. baumannii* to abnormally elongate, while MEC,  
365 imipenem (IPM), and meropenem (MER) caused cells to become spheres (Fig. 5a)<sup>27</sup>. These  
366 morphological changes reflect the described preferences of each  $\beta$ -lactam for transpeptidases  
367 acting within the divisome vs Rod system (divisome > Rod, SLB, AZT, and CEF; Rod >  
368 divisome, MEC, IPM, and MER)<sup>52</sup>. The small molecule A22, which inhibits the key Rod-system  
369 protein MreB<sup>51</sup>, also produced the expected spherical morphology at sub-MIC. Focusing on the  
370 Tn-seq data from these 7 treatments and untreated control conditions, we explored the genome  
371 via PCA for phenotypic signatures allowing discrimination of the two forms of morphological  
372 stress. We predicted that the corresponding genes might reveal envelope pathways involved in  
373 intrinsic defense against specific block of elongation or division.

374 A set of discriminating genes was identified whose fitness signatures revealed  
375 significant differences between stresses that target the two systems (Materials and Methods, Fig.  
376 5b). Among these are mutants that showed low Tn-seq fitness with divisome-targeting  
377 antibiotics, but relatively high fitness during challenge with Rod-targeting agents (Fig. 5b,  
378 dashed box). This cluster included PBP2 and RodA, known members of the Rod system that are  
379 non-essential for viability in *A. baumannii* (Supplementary Data 1)<sup>27</sup>. Mutation of *mreB*, *mreC*,  
380 and *mreD*, additional key members of the Rod-system, caused a pattern of selective  
381 susceptibility across all antibiotics similar to that of *pbp2* and *rodA* (Supplementary Fig. 5,  $r =$   
382  $0.42 - 0.82$ ,  $p < 0.018$ ). Targeted deletion of *pbp2* recapitulated the Tn-seq results (Fig. 5b,c), as

383 *Δpbp2* showed defective growth in the presence of divisome-targeting (SLB and AZT) but not  
384 Rod-system targeting (MEC, IPM, MER, A22) antibiotics in broth culture (Fig. 5d). The MIC of  
385 SLB also was reduced compared to WT during growth on solid medium by *Δpbp2*, consistent  
386 with the broth results (Fig. 5g). The growth defect with SLB was reversed by *in trans* expression  
387 of *pbp2* (Fig. 5h). This result was not dependent on strain background, as a *pbp2* mutation in the  
388 multidrug resistant (MDR) background AB5075 resulted in hypersensitivity profiles that were  
389 similar to ATCC 17978 (Supplementary Fig. 5). Therefore, when mutations inactivate the Rod  
390 system, *A. baumannii* is hypersensitized to  $\beta$ -lactam targeting of the divisome PG synthesis  
391 machinery. In contrast, attack by low concentrations of Rod-targeting drugs (MEC, MER, IPM,  
392 A22) on Rod system mutants is indistinguishable from the effects of these treatments on WT.

393 Strikingly, a gene cluster showing the reciprocal pattern of hypersensitivity, low fitness  
394 with Rod-targeting antibiotics and high fitness with divisome-targeting antibiotics, was not  
395 identified. This could be explained by the fact that many proteins of the divisome are essential  
396 and corresponding Tn mutants could not be evaluated. These results could also reflect the  
397 possibility that Rod complex proteins are able to act within the divisome<sup>51</sup>, while divisome  
398 complex proteins cannot act in the Rod complex.

399 In addition to Rod system members, we identified three uncharacterized genes that co-  
400 cluster with mutations in known Rod system-encoding genes and have signatures discriminating  
401 between filamentation and sphere-formation (Fig. 5b). The first gene, ACX60\_RS03475,  
402 encodes a protein with a YkuD-like domain found in L,D-transpeptidase enzymes<sup>53</sup>, with the  
403 others encoding an SH3\_and\_anchor domain (ACX60\_RS02860) and a protein with homology  
404 to PBP5 and PBP6 D,D-carboxypeptidases (ACX60\_RS04555, DacC<sup>54</sup>) (Fig. 5f). The  
405 susceptibility signatures of these three genes, which were defined by hypersensitivity to SLB but

406 not antibiotics targeting the Rod system, are significantly correlated with those of Rod system  
407 mutants (Fig. 5c and Supplementary Fig. 5,  $r = 0.44 - 0.78$ ,  $p < 0.011$ ). It is likely that the  
408 products of these genes are necessary for Rod system function. Based on their phenotypic  
409 signatures and the experiments described below, we have named ACX60\_RS03475 *elsL* and  
410 ACX60\_RS02860 *elsS* (elongation and SLB susceptibility defects, containing L,D-  
411 transpeptidase family catalytic domain or SH3 domain, respectively).

412 We pursued *elsL*, *elsS*, and *dacC* in subsequent analyses with targeted deletions. Each  
413 deletion resulted in selective susceptibilities to divisome-targeting but not to Rod system-  
414 targeting antibiotics, with defects mimicking those caused by  $\Delta pbp2$  (Fig. 5d,e,g). In the  
415 presence of low levels of SLB, the  $\Delta elsL$  growth defect was reversed by reintroducing the cloned  
416 gene (Fig. 5h). The specificity of this result is emphasized by the fact that deletion of a second  
417 predicted L,D-transpeptidase (ACX60\_RS05685) had no effect on SLB susceptibility (Fig. 5g  
418 and Supplementary Fig. 5), consistent with the lack of effects in Tn-seq fitness challenge with  
419 most antibiotics (Supplementary Fig. 5). Therefore, *elsL* likely plays a dominant role in  
420 modulating  $\beta$ -lactam susceptibility. The mutation in *elsL* also caused a severe and selective  
421 growth defect with SLB in the MDR AB5075 background (Supplementary Fig. 5).

422 Loss of key Rod-system proteins causes characteristically rod-shaped cells to form  
423 spheroids<sup>27</sup>. Given the phenotypic signatures that connect *elsL*, *elsS*, and *dacC* with the Rod  
424 system, we predicted similar phenotypes with mutations in these genes. Indeed, deletion of *elsL*,  
425 *elsS*, or *dacC*, but not ACX60\_RS05685, caused cells to lose rod shape and become spherical  
426 (Fig. 5i; Supplementary Fig. 5), mimicking the effect of antibiotics that block the Rod system<sup>27</sup>  
427 (Fig. 5a). *elsL* mutation also caused the MDR strain AB5075 cells to become spherical,

428 indicating that the encoded protein functions similarly in recent clinical isolates (Supplementary  
429 Fig. 5).

430 The specific morphological and antibiotic susceptibility changes in *elsL*, *elsS*, and *dacC*  
431 mutants matching those caused by Rod-system block could be explained in at least two ways: the  
432 mutations could cause defects that indirectly affect Rod system function, or the proteins could  
433 themselves be important components of the Rod complex. We considered ElsS a candidate for  
434 the latter, based on analogy with *H. pylori*, in which an SH3 domain protein serves to scaffold a  
435 cell wall synthesis complex<sup>55</sup>. To determine protein interactions with ElsS, we fused its predicted  
436 soluble C-terminus (Fig. 5f) to fragments of adenylate cyclase (CyaA) for two-hybrid analysis.  
437 The ElsS chimeras were used to probe its interactions in *E. coli* with Rod system proteins fused  
438 to a complementary CyaA fragment (Materials and Methods). Interactions were found among the  
439 *A. baumannii* orthologs of Rod complex members including PBP2, RodA, MreC, MreD, and  
440 PBP1A (Fig 5j). In addition, ElsS generated a two-hybrid readout consistent with homo-  
441 oligomerization and interaction with at least one key Rod system component, PBP2 (Fig. 5j). A  
442 weak two-hybrid signal also resulted between ElsS and PBP1A, but not PBP1B, which is a  
443 member of the division complex<sup>51</sup> (Fig. 5j). Clustering of phenotypic signatures has therefore  
444 identified a novel shape determinant with the potential to directly modulate the *A. baumannii* PG  
445 assembly machinery.

446

#### 447 **Tn-seq analysis predicts synergistic antimicrobial combinations.**

448 On the basis of the result that mutational block of the Rod-system sensitizes *A.*  
449 *baumannii* to antibiotics attacking divisome PG synthesis, we hypothesized that combining an  
450 antimicrobial that targets the Rod-system with one that targets the divisome would achieve

451 synergistic killing. Pairwise combinations of antibiotics targeting each system (Fig. 6a) were  
452 systematically tested for ability to block bacterial growth using an established method (diagonal  
453 sampling) that allows high numbers of drug interactions to be tested in parallel<sup>56</sup>. COL, a drug  
454 used in some combination therapies targeting Gram-negatives<sup>57</sup>, was also included in interaction  
455 testing. The log<sub>2</sub>-transformed Fractional Inhibitory Concentration (FIC) was used to quantify  
456 drug interactions<sup>58</sup>. Reminiscent of our results showing that simultaneous mutational block and  
457 antibiotic targeting of the Rod system fails to generate synergistic growth defects (Fig. 5b-e),  
458 simultaneous block of Rod system function by two agents showed an absence of synergistic  
459 effects (Fig. 6b, Supplementary Table 3). By contrast, when a Rod-targeting agent was combined  
460 with a divisome blocker, a log<sub>2</sub>FIC value < 0 was seen in every pairing (Fig. 6b, Supplementary  
461 Table 3), consistent with a synergistic interaction. Checkerboard assays confirmed these results  
462 and were again consistent with strong synergism as addition of divisome blocking drugs (AZT,  
463 CEF or SLB) with a Rod-targeting drug (MEC) showed strong synergy (Fig. 6c). This mimicked  
464 the consequences of adding divisome-blocking drugs to mutants defective in Rod system  
465 function (Fig. 5b; Supplementary Table 3). In pairings of two divisome-targeting agents, those  
466 involving AZT also showed negative log<sub>2</sub>FICs, and checkerboard tests confirmed modest  
467 synergy (Fig. 6c, Supplementary Table 3). Pairings with COL showed a mix of positive and  
468 negative log<sub>2</sub>FIC values, none of which was significantly altered from log<sub>2</sub>FIC 0 (Fig. 6b,  
469 Supplementary Table 3).

470

## 471 **Discussion**

472 In these studies, we have systematically analyzed determinants of drug susceptibility  
473 among nonessential genes in *A. baumannii*. These determinants become essential during

474 antibiotic therapy, allowing the identification of novel targets for potentiating antibiotics that  
475 have lost potency against the pathogen. The high saturation of Tn-seq insertions allowed  
476 identification of mutations in essential genes, such as *advA*, that allowed analysis of position-  
477 specific hypomorphic alleles. By examining how arrays of susceptibility phenotypes across  
478 diverse antibiotics are linked within the genome, we discovered functions for a variety of poorly  
479 characterized genes in multiple facets of envelope biogenesis.

480         Understanding the idiosyncrasies of envelope synthesis in *A. baumannii* can provide a  
481 path to attack the pathogen specifically. The organism has diverged from the Gram-negative  
482 paradigm and conspicuously lacks canonical proteins that coordinate cell septum formation with  
483 chromosome replication (SlmA) and cell separation (FtsE/X)<sup>24</sup>. Interestingly, cell division  
484 defects such as those caused by knockout of FtsZ-associated proteins or BlhA cause  
485 hypersensitivity to antibiotics targeting cell wall and DNA synthesis in *A. baumannii*<sup>30</sup>.  
486 Therefore, identifying susceptibility signatures in this fashion is likely to be an effective strategy  
487 of identifying “missing link” factors involved in coordinating cell division with DNA synthesis.  
488 Through this strategy, we identified a previously uncharacterized protein, AdvA, whose  
489 phenotypic signature in response to antibiotic stress strongly correlated with BlhA and other  
490 division-related protein phenotypic signatures. AdvA was shown to localize to cell division sites,  
491 while its depletion caused a lethal filamentation phenotype, consistent with a critical role in cell  
492 division (Fig. 3h). Conserved domain analysis of AdvA identified only a domain of unknown  
493 function, but homology modeling<sup>59</sup> predicted that its N-terminal region assumes a fold  
494 resembling the sensor domain of two-component system kinases, albeit of low sequence identity  
495 (Supplementary Fig. 3). Work is ongoing to dissect the role of this protein in coordinating cell  
496 division.

497           We leveraged the diversity in both subcellular targets and physiochemical properties of  
498 our tested antibiotics to mine the Tn-seq susceptibility signatures for unappreciated factors  
499 enhancing envelope resiliency. This led to the surprising result that a predicted cell wall  
500 hydrolytic enzyme, Pbp7/8 (PbpG), is required to maintain integrity of the OM permeability  
501 barrier. PbpG defects, like those affecting a core LOS glycosyltransferase, cause lowered LOS  
502 levels. Inefficient LOS production coupled to a second lesion may allow phospholipids to  
503 accumulate at higher density in the OM outer leaflet, weakening the barrier against lipophilic  
504 compounds<sup>44</sup>. The LOS defect also explains the impressive virulence attenuation of *pbpG*  
505 mutants<sup>45</sup>. How PbpG activity promotes efficient LOS synthesis remains to be elucidated. One  
506 possible model is that PbpG is the PG hydrolase allowing passage of bulky LOS through the cell  
507 wall by the Lpt complex<sup>60,61</sup>. When transit is blocked, increased periplasmic LOS<sup>62,63</sup> may trigger  
508 a down-shift in production of LOS and possibly other OM components in *A. baumannii*. In the  
509 “deep rough” *lpsB* mutants, similar regulation may occur due to detection of free LOS  
510 intermediates<sup>64</sup>. Intriguingly, PBP1B was also implicated in maintenance of OM integrity, with  
511 mutations in this enzyme causing selective polymyxin susceptibility that resembles the  
512 phenotypes of K or OC locus mutations. These findings together reveal additional ways that PG  
513 and OM synthesis pathways are tightly intertwined in *A. baumannii*<sup>50</sup> and indicate that targeting  
514 the cell wall may potentiate both antibiotic permeation and immune attack against these  
515 pathogens.

516           One of the most striking results from this work was the ability to predict synergistic  
517 relationships between  $\beta$ -lactam antibiotics based on antibiotic hypersensitivity of Tn-seq  
518 mutations (Figs. 5,6). Key to this approach was demonstrating that cell wall-disrupting  
519 antibiotics caused distinct morphological defects in *A. baumannii* that were dependent on the

520 identity of their specific targets. Antibiotics that disrupt cell wall elongation (Rod-system  
521 targeting), such as MEC and IPM, were shown to form rounded cells, while divisome targeting  
522 antibiotics, such as AZT, resulted in filamentous forms (Fig. 5a)<sup>27,52</sup>. Sensitivity to divisome-  
523 targeting drugs was clearly potentiated by mutations affecting elongation, while the identical  
524 mutations had little effect on fitness during treatment with Rod-system targeting drugs (Fig. 5b).  
525 As mutations in the Rod system potentiate the action of divisome-targeting drugs and generate  
526 morphological forms that phenocopy sphere-generating drugs, we reasoned that sphere- and  
527 filament-forming drugs should synergize with each other. In fact, AZT (filaments) and MEC  
528 (spheres) strongly synergized to kill *A. baumannii*, as predicted by the genetic analysis, whereas  
529 rod-targeting pairs such as IPM/MEC revealed no such effects (Fig. 6). This demonstrates that  
530 antibiotic synergies can be identified between drugs that target a single bacterial cell structure if  
531 the downstream consequences of each treatment can be morphologically distinguished. Our data  
532 agree with a strategy involving MEC described in *E. coli*<sup>65</sup>, and support the hypothesized  
533 mechanism by which diazabicyclooctanone adjuvants potentiate certain  $\beta$ -lactams against MDR  
534 strains of *A. baumannii* and *P. aeruginosa*<sup>66,67</sup>. It should be noted that the method of cytological  
535 profiling of bacterial cells in response to antibiotics has recently been shown to differentiate two  
536 cell wall-acting antibiotics from each other based on morphotypes<sup>68</sup>. Adding distinguishing  
537 variables within antibiotic classes to strategies that involve cytological profiling could be an  
538 important tool in developing new antimicrobials or identifying new strategies of combinatorial  
539 therapy.

540 Our overall approach should allow drug class synergies to be predicted as well as drive  
541 the identification of new drug targets that could potentiate currently available antimicrobials.  
542 For instance, the phenotypic signature of Rod system mutants permitted discovery of previously



543 unrecognized elongation-determining proteins in addition to showing synergy between  $\beta$ -  
544 lactams. The identification of these new proteins not only gives insight into mechanisms of PG  
545 growth that are specific to *A. baumannii*, but also identifies an attractive physiological process  
546 that could be targeted for designing new drugs. Similarly, clustered relationships that define  
547 mutations with similar phenotypes across drug classes allowed the identification of new  
548 candidate cell division proteins, at least one of which (AdvA) appears essential for *A. baumannii*  
549 growth. The identification of pathogen-specific proteins in essential physiological processes is  
550 an excellent first step in the development of designer drug therapies that allow specialized  
551 targeting of a subset of pathogens. To take full advantage of this strategy, however, drug  
552 hypersensitivity approaches must be developed that directly target the subset of essential genes  
553 shared by *A. baumannii* clinical isolates. We are currently developing these approaches in order  
554 to have a coordinated attack on the central essential physiological processes that support the  
555 survival and growth of this emerging pathogen.

556

557

## 558 **Materials and Methods**

559 **Bacterial strains, growth conditions, and antibiotics.** Bacterial strains used in this work are  
560 described in Supplementary Table 4. *A. baumannii* strains were derivatives of ATCC 17978  
561 unless otherwise stated. Bacterial cultures were grown at 37°C in Lysogeny Broth (LB) (10 g/L  
562 tryptone, 5 g/L yeast extract, 10 g/L NaCl) with aeration in flasks by shaking or in tubes on a  
563 roller drum. Growth was monitored by measuring absorbance at 600nm via spectrophotometer.  
564 LB agar was supplemented with antibiotics (ampicillin, 50-100  $\mu$ g/ml; carbenicillin, 50-100

565  $\mu\text{g/ml}$ ; chloramphenicol (CAM), 25  $\mu\text{g/ml}$ ; gentamicin, 10 $\mu\text{g/ml}$ ; kanamycin, 10-25  $\mu\text{g/ml}$ ;  
566 tetracycline, 10 $\mu\text{g/ml}$ ; or sucrose, 10%) for strain isolation as needed.

567

568 **Molecular cloning and isolation of defined mutants.** Plasmids used here are listed in  
569 Supplementary Table 4. DNA fragments were amplified using oligonucleotide primers (IDT,  
570 Supplementary Table 5) and were usually cloned in pUC18 before subcloning to vectors for  
571 recombination or gene expression. Gene deletions were constructed through ligation of ~1kb  
572 flanking homology arms as described<sup>49</sup>. Deletions of *advA*, *blhA*, *pbpG*, *lpsB*, *lpxL<sub>Ab</sub>*,  
573 ACX60\_RS05685, *dacC*, and *elsS* were constructed in-frame.  $\Delta\textit{elsL}$  was constructed as a  
574 deletion of the first 75 codons via a 500bp 3' homology arm due to difficulty cloning a  
575 homology arm extending into downstream tRNA sequences (Fig. 5c). Deletion constructs were  
576 subcloned in pSR47S or pJB4648 and used to isolate mutants of *A. baumannii* ATCC 17978 via  
577 homologous recombination with two selection steps<sup>49</sup>.  $\Delta\textit{advA}$  was isolated by transforming  
578 *advA*<sup>WT</sup>/ $\Delta\textit{advA}$  merodiploids with plasmids containing complementing DNA fragments  
579 (pEGE292 or pEGE309; Supplementary Table 4), followed by sucrose counterselection and  
580 screening for CIP<sup>S</sup>  $\Delta\textit{advA}$  double recombinants. In the case of pEGE292, all steps were carried  
581 out at temperatures at or below 30°C. In the case of pEGE309, double recombinants were  
582 isolated in the presence of 1mM IPTG. Isolation of deletion mutants was verified by colony  
583 PCR.

584 A constitutive *advA* was constructed by cloning *advA* including 78bp upstream sequence  
585 into the HincII site of pUC18 such that the ORF start site was oriented proximal to the PstI site.  
586 After digestion with PstI and XbaI, the resulting *advA* fragment was subcloned into the PstI and  
587 NheI sites of pMS88 to generate pEGE292. An *advA-gfp* translational fusion was constructed by

588 PCR-amplifying an *advA* fragment using primers incorporating an upstream BamHI site and an  
589 in-frame XbaI site replacing the stop codon. This site was ligated to a fragment containing *gfp*  
590 with an in-frame XbaI site and downstream PstI site cloned in pUC18. The *advA-gfp* construct  
591 was subcloned into pEGE305 downstream of T5*lacP* via EcoRI and PstI sites to generate  
592 pEGE309. *elsL* and *pbp2* were cloned into pEGE305 using the same sites. *pbpG* was cloned into  
593 a derivative of pEGE305 (pYDE153) containing an expanded multiple cloning site  
594 (Supplementary Table 4).

595 AB5075-UW and defined T26 transposon insertion mutants were obtained from the  
596 Manoil lab three-allele collection<sup>69</sup>. Each mutant was purified from single colonies on LB plates.  
597 Transposon location and absence of predicted second-site mutations was determined by whole-  
598 genome resequencing via modified small-volume Nextera method and BRESEQ<sup>27,70</sup> and by  
599 screening on Tc plates. Two independent AB5075 transposants for *pbpG* and *elsL* and one for  
600 *pbp2* were analyzed.

601  
602 **Transposon mutant libraries.** Tn10 mutant banks constructed in *A. baumannii* ATCC 17978  
603 with plasmid pDL1073<sup>20</sup> were used with most Tn-seq experiments. Tn-seq experiments with  
604 LEV and TMP-SMX employed mariner mutant banks constructed in ATCC 17978 using  
605 pDL1100. pDL1100 contains a Kan<sup>R</sup> mariner derivative, a hyperactive C9 mutant mariner  
606 transposase gene downstream of the phage lambda P<sub>L</sub> promoter, a pSC101ts origin of replication,  
607 and a CAM resistance gene (Supplementary Fig. 6). Tn libraries isolated with pDL1100 used the  
608 protocol described for pDL1073 with the following modifications. Cells electroporated with  
609 pDL1100 were first allowed to recover for 15 minutes in liquid SOC and were then spread onto  
610 membrane filters overlaid on pre-warmed SOC agar plates. After 1 hour incubation, membrane

611 filters were transferred to selective agar (LB + 20 $\mu$ g/ml kanamycin). Colonies arising after  
612 overnight incubation at 37°C were lifted from filters by agitation in sterile PBS, combined with  
613 glycerol (10% v/v), aliquoted and stored at -80°C.

614

615 **Tn-seq fitness measurements.** Transposon library aliquots (each containing approximately  
616 5,000 to 20,000 random mutants) were cultured in parallel in 10mL liquid LB medium at 37°C  
617 without or with graded concentrations of antibiotics for approximately 8 generations as  
618 described<sup>20</sup>. Samples taken at the start ( $t_1$ ) and end ( $t_2$ ) of this outgrowth were stored at -20°C.  
619 Drug-treated samples that showed 20-30% inhibition of growth rate relative to untreated control  
620 were chosen for analysis. In most cases, slightly different antibiotic concentrations yielded the  
621 optimal 20-30% inhibition with different independent libraries on different days, resulting in the  
622 binned concentration ranges across biological replicates shown in Supplementary Table 1. 10  
623 independent transposon libraries were analyzed with each antibiotic treatment. Most drug  
624 treatments were performed in pairs with a single untreated control, resulting in 20 distinct  
625 treatment conditions and 12 independent untreated controls.

626

627 **Tn-seq Illumina library preparation.** Illumina sequencing libraries were prepared from  
628 genomic DNA using described methods<sup>20</sup>, with the following modifications for mariner  
629 transposon library samples: olj638 and Nextera 2A-R were used in the first PCR, and Left  
630 mariner-specific indexing primers and Right index primers (Supplementary Table 5) were used  
631 in the second PCR. Samples were multiplexed, reconditioned, and size selected before  
632 sequencing (single-end 50bp) using custom primer olk115 (Tn10 libraries) or mar512 (mariner

633 libraries) on a HiSeq2500 with High Output V4 chemistry at Tufts University Genomics Core  
634 Facility.

635

636 **Tn-seq data analysis.** Sequencing read data were processed and used to calculate Tn mutant  
637 fitness based on mutant vs population-wide expansion between  $t_1$  and  $t_2$  using our published  
638 pipeline<sup>20</sup>. For a given treatment condition, average fitness and s.d. assigned to each gene were  
639 calculated from the fitness of all transposon mutants (across all mutant pools) having insertions  
640 in the first 90% of the gene. These fitness scores were normalized to the average fitness assigned  
641 to 18 “neutral” genes (pseudogenes or endogenous transposon-related genes) throughout the  
642 genome to enhance the accuracy of relative fitness measurements across diverse conditions<sup>20</sup>.  
643 With TOB treatment, LOWESS curve fitting for fitness normalization was performed via Prism  
644 8 (Graphpad). For each antibiotic, difference in gene average fitness due to treatment compared  
645 to untreated control ( $W_{diff}$ ) was deemed significant if it fulfilled previously described criteria:  
646 per-gene fitness calculated from  $n \geq 3$  data points,  $|W_{diff}| > 10\%$ , and q value  $< 0.05$  (unpaired t-  
647 test with FDR controlled by 2-stage step-up method of Benjamini, Krieger and Yekutieli, Prism  
648 8)<sup>20</sup>. Fitness scores per insertion along a genomic region were visualized with Integrative  
649 Genomics Viewer<sup>71</sup> after aggregating all scores across multiple independent transposon mutant  
650 libraries via the SingleFitness script<sup>72</sup>.

651 Hierarchical clustering of phenotypic signatures (gene-level fitness values compiled  
652 across all conditions) was performed by average linkage method using Qlucore Omics Explorer  
653 (3.5) and Cluster 3.0<sup>73</sup> and shown as dendrograms. Pearson correlation ( $r$ ) matrices were  
654 displayed as heatmap in Prism 8. Identification of discriminating phenotypic signatures by PCA  
655 was performed by using Qlucore Omics Explorer (3.5). After prefiltering out essential genes

656 showing low ( $<0.11$ ) fitness in untreated samples, fitness data were centered and scaled to zero  
657 mean and unit variance. Variables with low overall variance were filtered out, and PCA was used  
658 to visualize the data in three-dimensional space. Two-group or multigroup statistical testing was  
659 used to determine the significance with which variables could discriminate between annotated  
660 conditions. P-values were adjusted for multiple testing (q-value) using the Benjamini-Hochberg  
661 method, and discriminating variables with q-values below the indicated cut-off, resulting in 16-  
662 17 variables, were subjected to hierarchical cluster analysis.

663

664 **Validation of antibiotic susceptibilities identified by Tn-seq.** Pure cultures of defined mutants  
665 were diluted to  $A_{600}$  0.003 and grown +/- antibiotic in 96-well microtiter format at 37°C with  
666 shaking in a plate reader (Tecan M200 Pro, Biotek Epoch 2, or Biotek Synergy H2M). Growth  
667 was monitored as change in  $A_{600}$ . Antibiotic concentrations used are listed in Supplementary  
668 Table 1 unless otherwise noted. To measure sensitivity to SDS, RIF and SLB by the colony  
669 formation efficiency (CFE) assay<sup>27</sup>, serial dilutions of WT and isogenic deletion mutants were  
670 grown in absence or presence of graded concentrations of SDS or antibiotic on solid LB agar  
671 medium. After overnight growth at 37°C colony formation was enumerated and compared to  
672 untreated control. Limit of detection was approximately  $10^{-5}$  to  $10^{-6}$ .

673

674 **LOS analysis.** Bacteria were cultured to  $A_{600} \sim 0.5$ . 1ml was harvested by centrifugation,  
675 washed with PBS, then re-pelleted and resuspended in a volume of 1X Novex Tricine SDS  
676 sample buffer (Invitrogen) normalized for cell density (50 $\mu$ l per 1ml  $A_{600}$  0.5). Samples were  
677 boiled for 15 minutes and either cooled on ice (no proteinase K) or incubated with proteinase K  
678 (NEB) at 55°C for 1 hour. Samples were re-boiled and electrophoresed using the tricine buffer

679 system with Novex tricine 16%-acrylamide gels (Invitrogen). Spectra Multicolor Low Range  
680 Protein Ladder (Thermo) was included to indicate approximate molecular weights. Gels were  
681 fixed, washed, stained using Pro-Q Emerald 300 (Invitrogen), and imaged using UV  
682 transillumination (Biorad Chemidoc MP). Gels were subsequently stained with Coomassie  
683 Brilliant Blue for detection of total protein. Image lab software (Biorad) was used to quantify  
684 LOS or total protein intensity levels. Samples were normalized by dividing the LOS intensity  
685 level of each band region by the total protein level from Coomassie staining. Relative values  
686 were calculated by dividing each normalized LOS value by the total normalized LOS levels in  
687 WT.

688

689 **Microscopy.** Bacteria were immobilized on agarose pads (1% in PBS), and imaged via 100x/1.3  
690 phase-contrast objectives on a Zeiss Axiovert 200m or Leica AF6000 microscope with GFP filter  
691 cube.

692

693 **Bacterial two-hybrid analysis.** ElsS, MreD, and RodA hybrids were constructed by fusing the  
694 protein's C-terminus to the N-terminus of the CyaA fragment in pUT18 and pKNT25. Pbp2,  
695 MreC, PBP1A, and PBP1B hybrids were constructed by fusing the protein's N-terminus to the  
696 C-terminus of the CyaA fragment in pKT25 (Supplementary Table 4 and 5). Plasmids encoding  
697 CyaA fusions were cloned using XL1-blue at 30°C. Two-hybrid plasmid pairs were then co-  
698 transformed into BTH101 (*cya-99*). Transformants were isolated on LB agar plates containing  
699 carbenicillin and kanamycin at 30°C. Transformants were patched on LB agar indicator plates  
700 containing the same antibiotics plus IPTG (0.5 mM) and X-gal (40 µg/ml). Plates were incubated  
701 at 30°C for 24–48 h and imaged with darkfield illumination.

702

703 **Drug interaction assays.** Drug interaction experiments were performed in 384-well plates as  
704 previously described<sup>56,58</sup>. Drugs were printed via a digital drug dispenser (D300e Digital  
705 Dispenser, HP) using randomized dispense locations to minimize plate position effects. Bacterial  
706 growth was determined by measuring  $A_{600}$  after 16 hours at 37°C without shaking (BioTek  
707 Synergy HT). The diagonal sampling method was used to determine FIC values from 7 drug-  
708 drug interactions<sup>56,58</sup>. Bacterial sensitivity to linearly increasing drug dose up to MIC was  
709 determined for each single drug and each pairwise 2-drug mixture, and FIC values were  
710 calculated by comparing sensitivity to the drug mixture with sensitivity to each single drug.  
711 Checkerboard assay was used to validate interactions and were quantified using alpha scores as  
712 described<sup>74</sup>.

713

714 **Accession Number(s).** Sequencing reads were deposited into SRA database as: SRP158017,  
715 SRP157856, SRP158100, SRP158412, SRP158923.

716



## References

- 717  
718
- 719 1 Food and Drug Administration, H. in *Federal Register* Vol. 78 35155-35173 (2013).
  - 720 2 Tacconelli, E. *et al.* Discovery, research, and development of new antibiotics: the WHO  
721 priority list of antibiotic-resistant bacteria and tuberculosis. *Lancet Infect Dis* **18**, 318-  
722 327, doi:10.1016/S1473-3099(17)30753-3 (2018).
  - 723 3 CDC. (ed CDC U.S. Department of Health and Human Services) 64-68 (Atlanta, GA,  
724 2019).
  - 725 4 Weiner-Lastinger, L. M. *et al.* Antimicrobial-resistant pathogens associated with adult  
726 healthcare-associated infections: Summary of data reported to the National Healthcare  
727 Safety Network, 2015-2017. *Infect Control Hosp Epidemiol*, 1-18,  
728 doi:10.1017/ice.2019.296 (2019).
  - 729 5 Nowak, J. *et al.* High incidence of pandrug-resistant *Acinetobacter baumannii* isolates  
730 collected from patients with ventilator-associated pneumonia in Greece, Italy and Spain  
731 as part of the MagicBullet clinical trial. *J Antimicrob Chemother* **72**, 3277-3282,  
732 doi:10.1093/jac/dkx322 (2017).
  - 733 6 Qureshi, Z. A. *et al.* Colistin-resistant *Acinetobacter baumannii*: beyond carbapenem  
734 resistance. *Clin Infect Dis* **60**, 1295-1303, doi:10.1093/cid/civ048 (2015).
  - 735 7 Butler, D. A. *et al.* Multidrug Resistant *Acinetobacter baumannii*: Resistance by Any  
736 Other Name Would Still be Hard to Treat. *Curr Infect Dis Rep* **21**, 46,  
737 doi:10.1007/s11908-019-0706-5 (2019).
  - 738 8 Fournier, P. E. *et al.* Comparative genomics of multidrug resistance in *Acinetobacter*  
739 *baumannii*. *PLoS Genet* **2**, e7, doi:10.1371/journal.pgen.0020007 (2006).
  - 740 9 Gallagher, L. A., Lee, S. A. & Manoil, C. Importance of Core Genome Functions for an  
741 Extreme Antibiotic Resistance Trait. *MBio* **8**, doi:10.1128/mBio.01655-17 (2017).
  - 742 10 Geisinger, E., Huo, W., Hernandez-Bird, J. & Isberg, R. R. *Acinetobacter baumannii*:  
743 Envelope Determinants That Control Drug Resistance, Virulence, and Surface  
744 Variability. *Annu Rev Microbiol* **73**, 481-506, doi:10.1146/annurev-micro-020518-  
745 115714 (2019).
  - 746 11 Brochado, A. R. & Typas, A. High-throughput approaches to understanding gene  
747 function and mapping network architecture in bacteria. *Curr Opin Microbiol* **16**, 199-206,  
748 doi:10.1016/j.mib.2013.01.008 (2013).
  - 749 12 van Opijnen, T. & Camilli, A. Transposon insertion sequencing: a new tool for systems-  
750 level analysis of microorganisms. *Nat Rev Microbiol* **11**, 435-442,  
751 doi:10.1038/nrmicro3033 (2013).
  - 752 13 Nichols, R. J. *et al.* Phenotypic landscape of a bacterial cell. *Cell* **144**, 143-156,  
753 doi:10.1016/j.cell.2010.11.052 (2011).
  - 754 14 Tamae, C. *et al.* Determination of antibiotic hypersensitivity among 4,000 single-gene-  
755 knockout mutants of *Escherichia coli*. *J Bacteriol* **190**, 5981-5988,  
756 doi:10.1128/JB.01982-07 (2008).
  - 757 15 Murray, J. L., Kwon, T., Marcotte, E. M. & Whiteley, M. Intrinsic Antimicrobial  
758 Resistance Determinants in the Superbug *Pseudomonas aeruginosa*. *mBio* **6**, e01603-  
759 01615, doi:10.1128/mBio.01603-15 (2015).
  - 760 16 Rajagopal, M. *et al.* Multidrug Intrinsic Resistance Factors in *Staphylococcus aureus*  
761 Identified by Profiling Fitness within High-Diversity Transposon Libraries. *mBio* **7**,  
762 doi:10.1128/mBio.00950-16 (2016).

- 763 17 Xu, W. *et al.* Chemical Genetic Interaction Profiling Reveals Determinants of Intrinsic  
764 Antibiotic Resistance in Mycobacterium tuberculosis. *Antimicrob Agents Chemother* **61**,  
765 doi:10.1128/AAC.01334-17 (2017).
- 766 18 Santiago, M. *et al.* Genome-wide mutant profiling predicts the mechanism of a Lipid II  
767 binding antibiotic. *Nat Chem Biol* **14**, 601-608, doi:10.1038/s41589-018-0041-4 (2018).
- 768 19 Knauf, G. A. *et al.* Exploring the Antimicrobial Action of Quaternary Amines against  
769 Acinetobacter baumannii. *MBio* **9**, doi:10.1128/mBio.02394-17 (2018).
- 770 20 Geisinger, E. *et al.* The Landscape of Phenotypic and Transcriptional Responses to  
771 Ciprofloxacin in Acinetobacter baumannii: Acquired Resistance Alleles Modulate Drug-  
772 Induced SOS Response and Prophage Replication. *MBio* **10**, doi:10.1128/mBio.01127-19  
773 (2019).
- 774 21 Ghatak, S., King, Z. A., Sastry, A. & Palsson, B. O. The y-ome defines the 35% of  
775 Escherichia coli genes that lack experimental evidence of function. *Nucleic Acids Res* **47**,  
776 2446-2454, doi:10.1093/nar/gkz030 (2019).
- 777 22 Price, M. N. *et al.* Mutant phenotypes for thousands of bacterial genes of unknown  
778 function. *Nature* **557**, 503-509, doi:10.1038/s41586-018-0124-0 (2018).
- 779 23 Schnoes, A. M., Brown, S. D., Dodevski, I. & Babbitt, P. C. Annotation error in public  
780 databases: misannotation of molecular function in enzyme superfamilies. *PLoS Comput*  
781 *Biol* **5**, e1000605, doi:10.1371/journal.pcbi.1000605 (2009).
- 782 24 Robinson, A. *et al.* Essential biological processes of an emerging pathogen: DNA  
783 replication, transcription, and cell division in Acinetobacter spp. *Microbiol Mol Biol Rev*  
784 **74**, 273-297, doi:10.1128/MMBR.00048-09 (2010).
- 785 25 Chao, M. C., Abel, S., Davis, B. M. & Waldor, M. K. The design and analysis of  
786 transposon insertion sequencing experiments. *Nat Rev Microbiol* **14**, 119-128,  
787 doi:10.1038/nrmicro.2015.7 (2016).
- 788 26 Yoon, E. J. *et al.* Contribution of resistance-nodulation-cell division efflux systems to  
789 antibiotic resistance and biofilm formation in Acinetobacter baumannii. *MBio* **6**, e00309-  
790 00315, doi:10.1128/mBio.00309-15 (2015).
- 791 27 Geisinger, E., Mortman, N. J., Vargas-Cuebas, G., Tai, A. K. & Isberg, R. R. A global  
792 regulatory system links virulence and antibiotic resistance to envelope homeostasis in  
793 Acinetobacter baumannii. *PLoS Pathog* **14**, e1007030, doi:10.1371/journal.ppat.1007030  
794 (2018).
- 795 28 Boll, J. M. *et al.* Reinforcing Lipid A Acylation on the Cell Surface of Acinetobacter  
796 baumannii Promotes Cationic Antimicrobial Peptide Resistance and Desiccation  
797 Survival. *MBio* **6**, e00478-00415, doi:10.1128/mBio.00478-15 (2015).
- 798 29 Luke, N. R. *et al.* Identification and characterization of a glycosyltransferase involved in  
799 Acinetobacter baumannii lipopolysaccharide core biosynthesis. *Infect Immun* **78**, 2017-  
800 2023, doi:IAI.00016-10 [pii] 10.1128/IAI.00016-10 (2010).
- 801 30 Knight, D., Dimitrova, D. D., Rudin, S. D., Bonomo, R. A. & Rather, P. N. Mutations  
802 Decreasing Intrinsic beta-Lactam Resistance Are Linked to Cell Division in the  
803 Nosocomial Pathogen Acinetobacter baumannii. *Antimicrob Agents Chemother* **60**, 3751-  
804 3758, doi:10.1128/AAC.00361-16 (2016).
- 805 31 Mayer, C. Peptidoglycan Recycling, a Promising Target for Antibiotic Adjuvants in  
806 Antipseudomonal Therapy. *J Infect Dis* **220**, 1713-1715, doi:10.1093/infdis/jiz378  
807 (2019).

- 808 32 Srivastava, D. *et al.* A Proteolytic Complex Targets Multiple Cell Wall Hydrolases in  
809 *Pseudomonas aeruginosa*. *MBio* **9**, doi:10.1128/mBio.00972-18 (2018).
- 810 33 Kamischke, C. *et al.* The *Acinetobacter baumannii* Mla system and glycerophospholipid  
811 transport to the outer membrane. *Elife* **8**, doi:10.7554/eLife.40171 (2019).
- 812 34 Malinverni, J. C. & Silhavy, T. J. An ABC transport system that maintains lipid  
813 asymmetry in the gram-negative outer membrane. *Proc Natl Acad Sci U S A* **106**, 8009-  
814 8014, doi:10.1073/pnas.0903229106 (2009).
- 815 35 Gardner, S. G. & McCleary, W. R. Control of the *phoBR* Regulon in *Escherichia coli*.  
816 *EcoSal Plus* **8**, doi:10.1128/ecosalplus.ESP-0006-2019 (2019).
- 817 36 Marchler-Bauer, A. *et al.* CDD/SPARCLE: functional classification of proteins via  
818 subfamily domain architectures. *Nucleic Acids Res* **45**, D200-D203,  
819 doi:10.1093/nar/gkw1129 (2017).
- 820 37 LaBauve, A. E. & Wargo, M. J. Detection of host-derived sphingosine by *Pseudomonas*  
821 *aeruginosa* is important for survival in the murine lung. *PLoS Pathog* **10**, e1003889,  
822 doi:10.1371/journal.ppat.1003889 (2014).
- 823 38 van den Berg, B., Bhamidimarri, S. P. & Winterhalter, M. Crystal structure of a  
824 COG4313 outer membrane channel. *Sci Rep* **5**, 11927, doi:10.1038/srep11927 (2015).
- 825 39 Dodd, D. *et al.* Functional comparison of the two *Bacillus anthracis* glutamate racemases.  
826 *J Bacteriol* **189**, 5265-5275, doi:10.1128/JB.00352-07 (2007).
- 827 40 Fisher, S. L. Glutamate racemase as a target for drug discovery. *Microb Biotechnol* **1**,  
828 345-360, doi:10.1111/j.1751-7915.2008.00031.x (2008).
- 829 41 Graciet, E. *et al.* Aminoacyl-transferases and the N-end rule pathway of  
830 prokaryotic/eukaryotic specificity in a human pathogen. *Proc Natl Acad Sci U S A* **103**,  
831 3078-3083, doi:10.1073/pnas.0511224103 (2006).
- 832 42 Gao, X., Yeom, J. & Groisman, E. A. The expanded specificity and physiological role of  
833 a widespread N-degron recognin. *Proc Natl Acad Sci U S A* **116**, 18629-18637,  
834 doi:10.1073/pnas.1821060116 (2019).
- 835 43 Meyer, R., Hinds, M. & Brasch, M. Properties of R1162, a broad-host-range, high-copy-  
836 number plasmid. *J Bacteriol* **150**, 552-562 (1982).
- 837 44 Nikaido, H. Molecular basis of bacterial outer membrane permeability revisited.  
838 *Microbiol Mol Biol Rev* **67**, 593-656 (2003).
- 839 45 Russo, T. A. *et al.* Penicillin-binding protein 7/8 contributes to the survival of  
840 *Acinetobacter baumannii* in vitro and in vivo. *J Infect Dis* **199**, 513-521,  
841 doi:10.1086/596317 (2009).
- 842 46 Kenyon, J. J. & Hall, R. M. Variation in the complex carbohydrate biosynthesis loci of  
843 *Acinetobacter baumannii* genomes. *PLoS One* **8**, e62160,  
844 doi:10.1371/journal.pone.0062160 PONE-D-13-00202 [pii] (2013).
- 845 47 Kenyon, J. J., Nigro, S. J. & Hall, R. M. Variation in the OC locus of *Acinetobacter*  
846 *baumannii* genomes predicts extensive structural diversity in the lipooligosaccharide.  
847 *PLoS One* **9**, e107833, doi:10.1371/journal.pone.0107833 (2014).
- 848 48 Lees-Miller, R. G. *et al.* A common pathway for O-linked protein-glycosylation and  
849 synthesis of capsule in *Acinetobacter baumannii*. *Mol Microbiol* **89**, 816-830,  
850 doi:10.1111/mmi.12300 (2013).
- 851 49 Geisinger, E. & Isberg, R. R. Antibiotic modulation of capsular exopolysaccharide and  
852 virulence in *Acinetobacter baumannii*. *PLoS Pathog* **11**, e1004691,  
853 doi:10.1371/journal.ppat.1004691 (2015).

- 854 50 Boll, J. M. *et al.* A penicillin-binding protein inhibits selection of colistin-resistant,  
855 lipooligosaccharide-deficient *Acinetobacter baumannii*. *Proc Natl Acad Sci U S A* **113**,  
856 E6228-E6237, doi:10.1073/pnas.1611594113 (2016).
- 857 51 Typas, A., Banzhaf, M., Gross, C. A. & Vollmer, W. From the regulation of  
858 peptidoglycan synthesis to bacterial growth and morphology. *Nat Rev Microbiol* **10**, 123-  
859 136, doi:10.1038/nrmicro2677 (2011).
- 860 52 Penwell, W. F. *et al.* Molecular mechanisms of sulbactam antibacterial activity and  
861 resistance determinants in *Acinetobacter baumannii*. *Antimicrob Agents Chemother* **59**,  
862 1680-1689, doi:10.1128/AAC.04808-14 (2015).
- 863 53 Magnet, S., Dubost, L., Marie, A., Arthur, M. & Gutmann, L. Identification of the L,D-  
864 transpeptidases for peptidoglycan cross-linking in *Escherichia coli*. *J Bacteriol* **190**,  
865 4782-4785, doi:10.1128/JB.00025-08 (2008).
- 866 54 Cayo, R. *et al.* Analysis of genes encoding penicillin-binding proteins in clinical isolates  
867 of *Acinetobacter baumannii*. *Antimicrob Agents Chemother* **55**, 5907-5913,  
868 doi:10.1128/AAC.00459-11 (2011).
- 869 55 Blair, K. M. *et al.* The *Helicobacter pylori* cell shape promoting protein Csd5 interacts  
870 with the cell wall, MurF, and the bacterial cytoskeleton. *Mol Microbiol* **110**, 114-127,  
871 doi:10.1111/mmi.14087 (2018).
- 872 56 Cokol, M., Kuru, N., Bicak, E., Larkins-Ford, J. & Aldridge, B. B. Efficient measurement  
873 and factorization of high-order drug interactions in *Mycobacterium tuberculosis*. *Sci Adv*  
874 **3**, e1701881, doi:10.1126/sciadv.1701881 (2017).
- 875 57 Schmid, A. *et al.* Monotherapy versus combination therapy for multidrug-resistant Gram-  
876 negative infections: Systematic Review and Meta-Analysis. *Sci Rep* **9**, 15290,  
877 doi:10.1038/s41598-019-51711-x (2019).
- 878 58 Cokol, M., Li, C. & Chandrasekaran, S. Chemogenomic model identifies synergistic drug  
879 combinations robust to the pathogen microenvironment. *PLoS Comput Biol* **14**,  
880 e1006677, doi:10.1371/journal.pcbi.1006677 (2018).
- 881 59 Kelley, L. A., Mezulis, S., Yates, C. M., Wass, M. N. & Sternberg, M. J. The Phyre2 web  
882 portal for protein modeling, prediction and analysis. *Nat Protoc* **10**, 845-858,  
883 doi:10.1038/nprot.2015.053 (2015).
- 884 60 More, N. *et al.* Peptidoglycan Remodeling Enables *Escherichia coli* To Survive Severe  
885 Outer Membrane Assembly Defect. *mBio* **10**, doi:10.1128/mBio.02729-18 (2019).
- 886 61 Okuda, S., Sherman, D. J., Silhavy, T. J., Ruiz, N. & Kahne, D. Lipopolysaccharide  
887 transport and assembly at the outer membrane: the PEZ model. *Nat Rev Microbiol* **14**,  
888 337-345, doi:10.1038/nrmicro.2016.25 (2016).
- 889 62 Ruiz, N., Gronenberg, L. S., Kahne, D. & Silhavy, T. J. Identification of two inner-  
890 membrane proteins required for the transport of lipopolysaccharide to the outer  
891 membrane of *Escherichia coli*. *Proc Natl Acad Sci U S A* **105**, 5537-5542,  
892 doi:10.1073/pnas.0801196105 (2008).
- 893 63 Sperandio, P. *et al.* Characterization of *lptA* and *lptB*, two essential genes implicated in  
894 lipopolysaccharide transport to the outer membrane of *Escherichia coli*. *J Bacteriol* **189**,  
895 244-253, doi:10.1128/JB.01126-06 (2007).
- 896 64 Lima, S., Guo, M. S., Chaba, R., Gross, C. A. & Sauer, R. T. Dual molecular signals  
897 mediate the bacterial response to outer-membrane stress. *Science* **340**, 837-841,  
898 doi:10.1126/science.1235358 (2013).



- 899 65 Gutmann, L. *et al.* Involvement of penicillin-binding protein 2 with other penicillin-  
900 binding proteins in lysis of *Escherichia coli* by some beta-lactam antibiotics alone and in  
901 synergistic lytic effect of amdinocillin (mecillinam). *Antimicrob Agents Chemother* **30**,  
902 906-912, doi:10.1128/aac.30.6.906 (1986).
- 903 66 Durand-Reville, T. F. *et al.* ETX2514 is a broad-spectrum beta-lactamase inhibitor for the  
904 treatment of drug-resistant Gram-negative bacteria including *Acinetobacter baumannii*.  
905 *Nat Microbiol* **2**, 17104, doi:10.1038/nmicrobiol.2017.104 (2017).
- 906 67 Moya, B. *et al.* WCK 5107 (Zidebactam) and WCK 5153 Are Novel Inhibitors of PBP2  
907 Showing Potent "beta-Lactam Enhancer" Activity against *Pseudomonas aeruginosa*,  
908 Including Multidrug-Resistant Metallo-beta-Lactamase-Producing High-Risk Clones.  
909 *Antimicrob Agents Chemother* **61**, doi:10.1128/AAC.02529-16 (2017).
- 910 68 Htoo, H. H. *et al.* Bacterial Cytological Profiling as a Tool To Study Mechanisms of  
911 Action of Antibiotics That Are Active against *Acinetobacter baumannii*. *Antimicrob*  
912 *Agents Chemother* **63**, doi:10.1128/AAC.02310-18 (2019).
- 913 69 Gallagher, L. A. *et al.* Resources for Genetic and Genomic Analysis of Emerging  
914 Pathogen *Acinetobacter baumannii*. *J Bacteriol* **197**, 2027-2035, doi:10.1128/JB.00131-  
915 15 (2015).
- 916 70 Deatherage, D. E. & Barrick, J. E. Identification of mutations in laboratory-evolved  
917 microbes from next-generation sequencing data using breseq. *Methods Mol Biol* **1151**,  
918 165-188, doi:10.1007/978-1-4939-0554-6\_12 (2014).
- 919 71 Robinson, J. T. *et al.* Integrative genomics viewer. *Nat Biotechnol* **29**, 24-26,  
920 doi:10.1038/nbt.1754 (2011).
- 921 72 McCoy, K. M., Antonio, M. L. & van Opijnen, T. MAGenTA: a Galaxy implemented  
922 tool for complete Tn-Seq analysis and data visualization. *Bioinformatics* **33**, 2781-2783,  
923 doi:10.1093/bioinformatics/btx320 (2017).
- 924 73 de Hoon, M. J., Imoto, S., Nolan, J. & Miyano, S. Open source clustering software.  
925 *Bioinformatics* **20**, 1453-1454, doi:10.1093/bioinformatics/bth078 (2004).
- 926 74 Cokol, M. *et al.* Systematic exploration of synergistic drug pairs. *Mol Syst Biol* **7**, 544,  
927 doi:10.1038/msb.2011.71 (2011).
- 928 75 Dobson, L., Remenyi, I. & Tusnady, G. E. CCTOP: a Consensus Constrained TOPology  
929 prediction web server. *Nucleic Acids Res* **43**, W408-412, doi:10.1093/nar/gkv451 (2015).
- 930 76 Sanchez-Garcia, C. *et al.* Anti-predator behaviour of adult red-legged partridge (*Alectoris*  
931 *rufa*) tutors improves the defensive responses of farm-reared broods. *Br Poult Sci* **57**,  
932 306-316, doi:10.1080/00071668.2016.1162283 (2016).
- 933 77 Kall, L., Krogh, A. & Sonnhammer, E. L. Advantages of combined transmembrane  
934 topology and signal peptide prediction--the Phobius web server. *Nucleic Acids Res* **35**,  
935 W429-432, doi:10.1093/nar/gkm256 (2007).
- 936

937

938 **Acknowledgements.**

939 This work was supported by NIAID awards U01AI124302 to RRI and TVO, R21AI128328 to  
940 RRI, and F32AI098358 to EG. Northeastern University College of Science startup funds  
941 supported the work of EG, YD, AF, and AT. NSF REU Site Award #1560388 to the Tufts  
942 University Department of Chemical and Biological Engineering supported the research of DF.  
943 We thank Richard Meyer for gift of plasmid pMS88, Roniche Wilson for technical assistance,  
944 and Jason Rosch, Vaughn Cooper and members of the Geisinger and Isberg labs for helpful  
945 discussions.

946

947 **Author Contributions**

948 E.G. and R.R.I. designed the experiments, supervised research, and wrote and edited the  
949 manuscript with important contributions from T.v.O; N.J.M, S.S. and D.F. performed Tn-seq  
950 experiments; E.G., S.W., J.A. and T.v.O optimized Tn-seq analysis pipeline and analyzed Tn-seq  
951 data; E.G., Y.D., A.F. and A.T. constructed defined mutant strains; E.G., N.J.M, Y.D., A.F.  
952 performed experiments testing defined mutant phenotypes; A.F. and A.T. constructed and tested  
953 two-hybrid interactions; D.L. constructed transposon delivery plasmid; M.C. performed and  
954 analyzed drug-drug interaction experiments.

955

956 **Competing Interests**

957 The authors declare no competing financial interests.

958

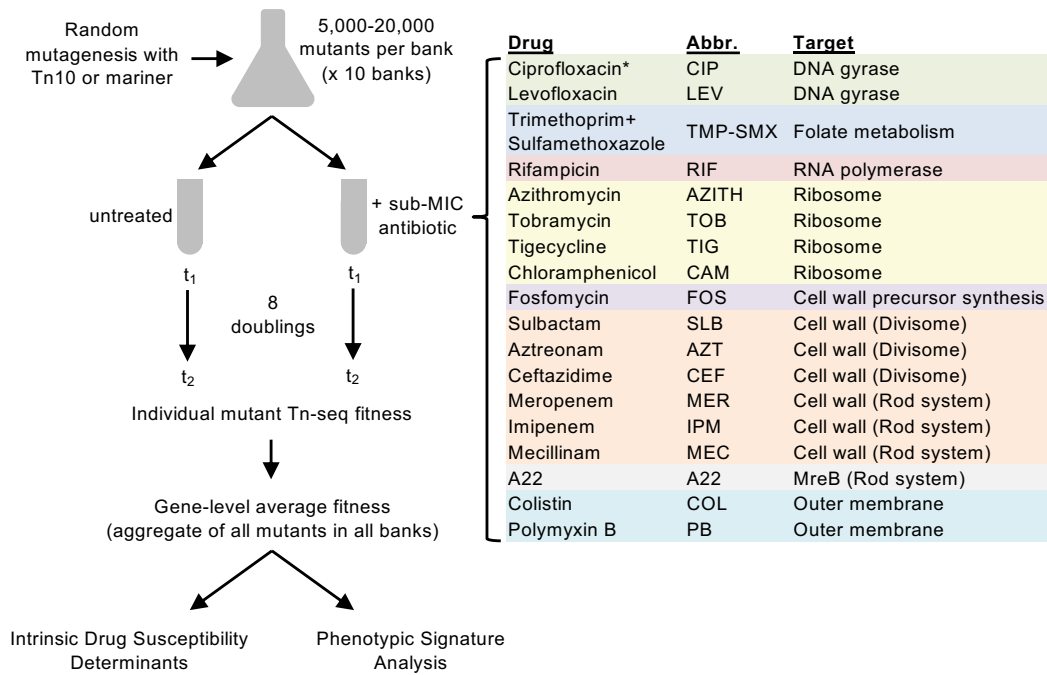

**Fig. 1. Genome-wide Tn-seq approach to profile *A. baumannii* mutant fitness during challenge with diverse, sub-MIC antibiotics.**

Diagram outlines the multiple parallel Tn-seq fitness profiling experiments as described in Materials and Methods. Drug concentrations used to achieve 20-30% growth rate inhibition are listed in Supplementary Table 1. For each antibiotic, genes contributing to intrinsic defense against each single drug were identified by using significance criteria (Materials and Methods). Fitness profiles across all conditions (phenotypic signatures) were then analyzed to identify novel gene relationships and discover multi-condition discriminating genes. Drug abbreviations (Abbr.) and targets are listed. \*, CIP Tn-seq data used in these studies were described previously<sup>20</sup>.

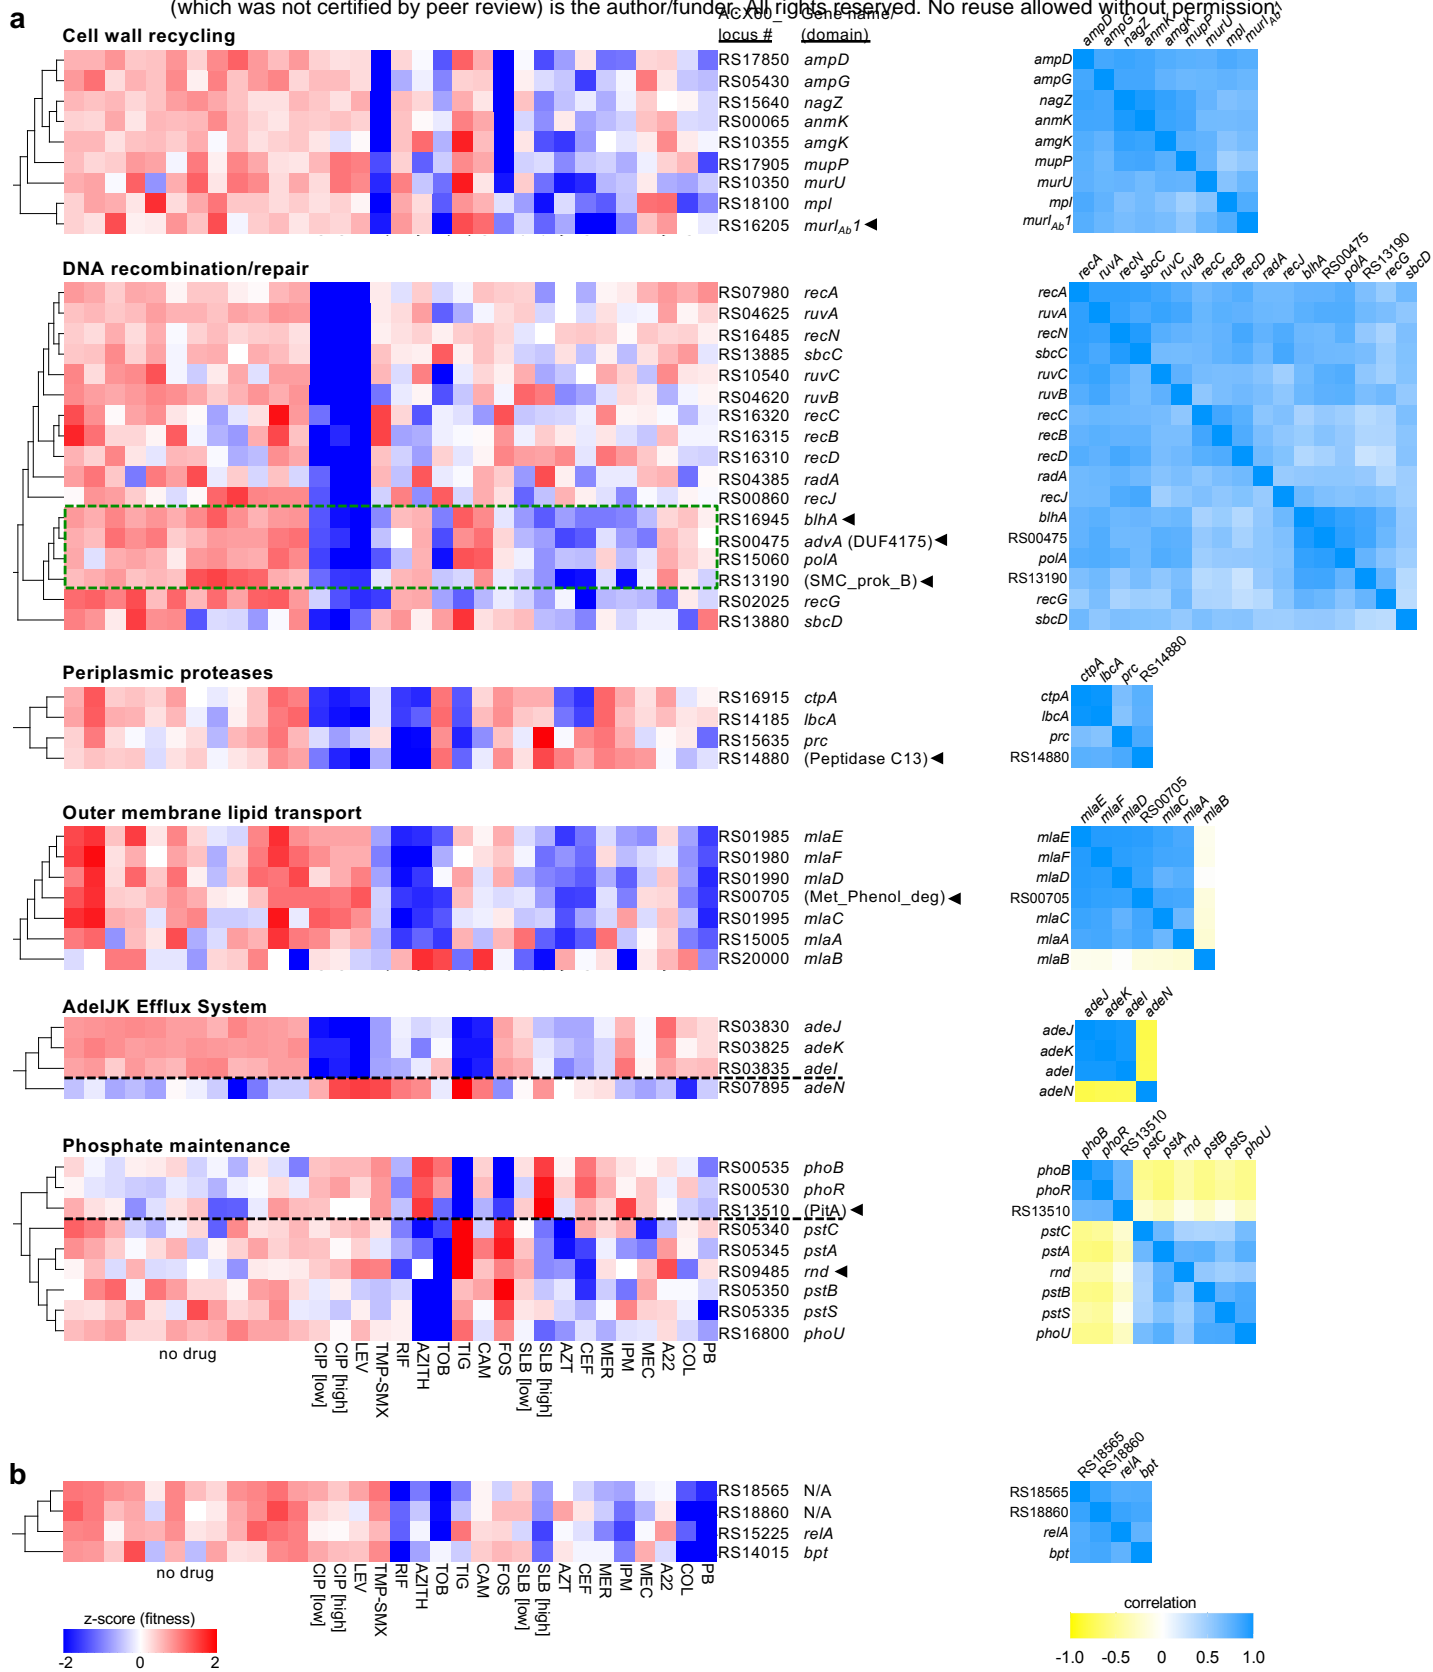

**Fig. 2. *A. baumannii* genes with interconnected functions show correlated Tn-seq fitness signatures.** **a**, Genes within a shared functional pathway show relationships in their Tn-seq fitness signatures. Heat map on left shows normalized Tn-seq fitness in z-scored units for mutants in each gene (rows) grown in distinct conditions (columns). Characterized/annotated genes were placed into pathways based on functional annotation, orthology in well-studied organisms, and/or GO terms. Hierarchical clustering with the entire set of *A. baumannii* phenotypic signatures identified uncharacterized/unannotated genes (arrowheads) that correlate with each pathway. Parentheses denote domains identified from NCBI conserved domain database (CDD)<sup>36</sup>. Green dashed box indicates sub-cluster based on hypersensitivity to fluoroquinolones and  $\beta$ -lactams. Dashed black lines separate genes with opposing regulatory effects. Heat map on right shows Pearson correlation coefficient ( $r$ ) matrices measuring relatedness of the Tn-seq fitness signatures. Positive and negative  $r$  indicate correlation and anticorrelation, respectively. **b**, Phenotypic signatures correlating with pAB3-encoded ACX60\_RS18565. Tn-seq fitness (left) and correlations (right) are shown as in **a**. N/A, no gene name or predicted protein domain.



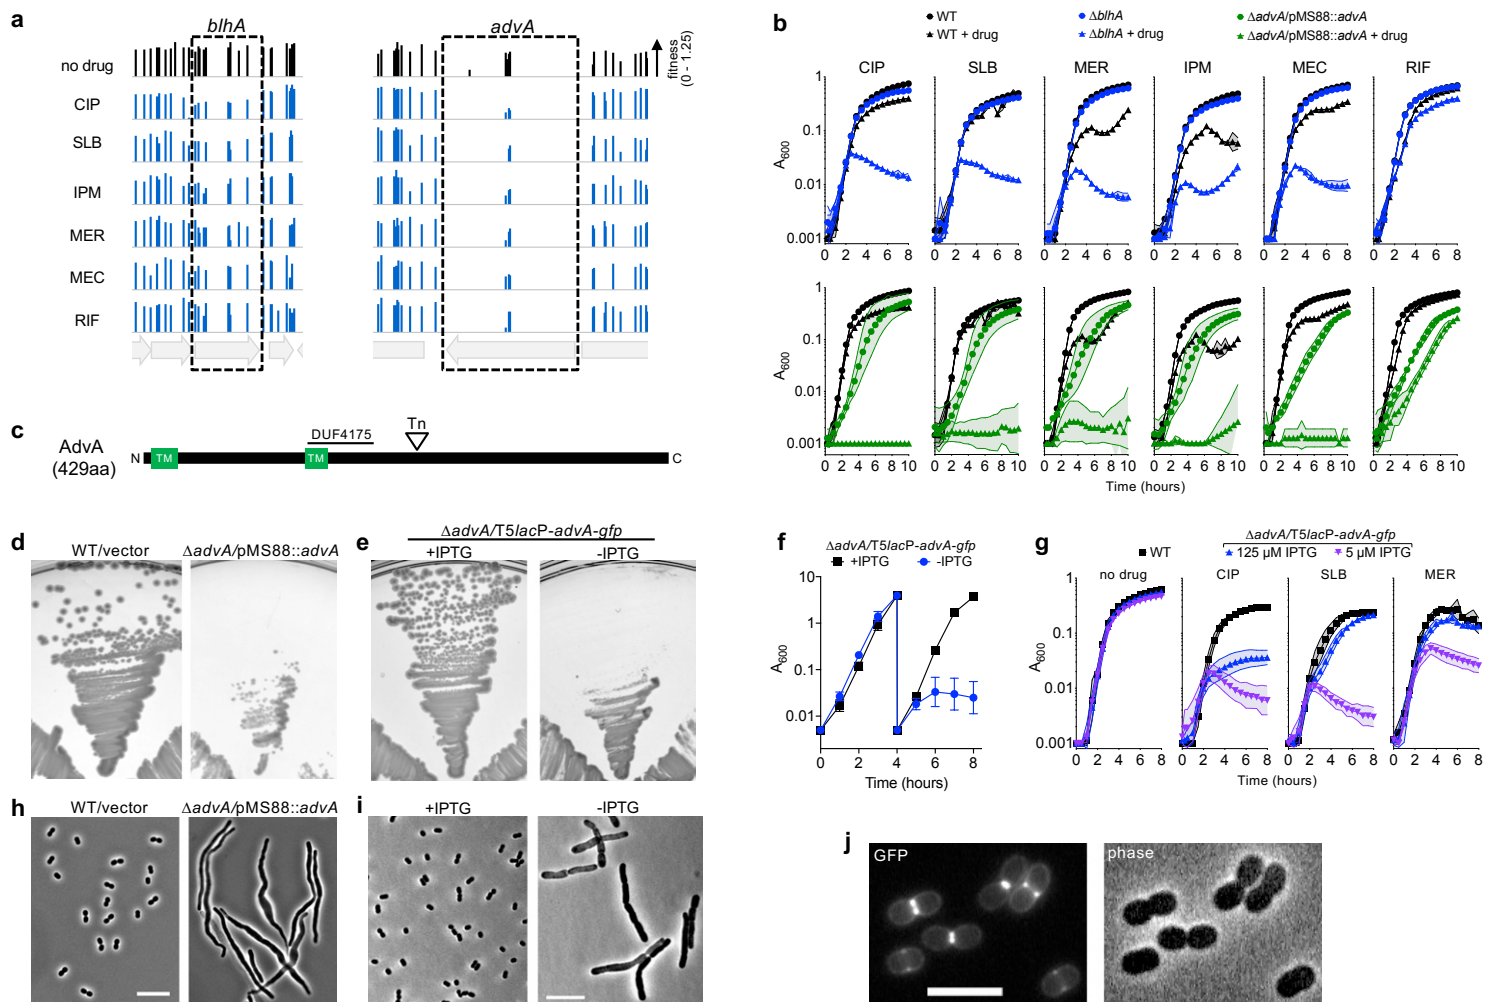

**Fig. 3. AdvA (ACX60\_RS00475) is a critical cell division protein in *A. baumannii*.** **a**, Tn-seq fitness of transposon mutants mapping to *blhA* and *advA*. Bars show fitness values of individual Tn10 transposon mutants at each locus across all tested banks grown in the indicated condition. Transposon insertions in *advA* yielding detectable fitness values in rich medium were limited to a specific region of the gene. **b**, Validation of Tn-seq drug hypersensitivity phenotypes using independent cultures of defined mutants EGA746 ( $\Delta blhA$ , top, blue symbols) or EGA745 ( $\Delta advA/pMS88::advA$ , bottom, green symbols) vs WT (black symbols). Symbols indicate geometric mean and area-filled dotted bands indicate s.d. (n = 3). Where not visible, s.d. is within the confines of the symbol. **c**, Schematic of AdvA protein and domain predictions. Approximate location of transposon (Tn) insertions within *advA* is indicated. Transmembrane (TM) helices were predicted via CCTOP<sup>75</sup>. **d, e**, AdvA is essential for colony formation. EGA745 or WT control were grown on solid medium at 37°C (d). AFA11 ( $\Delta advA$  harboring *T5lacP-advA-gfp*) were grown on solid medium with or without 0.5 mM IPTG (e). **f**, AdvA is essential for growth in broth. AFA11 pre-grown with 1 mM IPTG was diluted into LB +/- 1 mM IPTG, followed by dilution into the same medium after 4 hours. Growth at 37°C was monitored by  $A_{600}$  via 1-cm cuvettes. Data points show geometric mean +/- s.d. (n = 3). **g**, AdvA level determines antibiotic susceptibility. AFA11 pre-grown with 250  $\mu$ M IPTG was washed and resuspended in LB with 5  $\mu$ M or 125  $\mu$ M IPTG. Cultures were grown in the absence or presence of the indicated antibiotic at sub-MIC (Supplementary Table 1) in microtiter format. WT was included as control. **h, i**, *advA* deficiency results in cell filamentation. The indicated strains grown with or without inducer as noted were imaged via phase-contrast microscopy. Scale bar, 10  $\mu$ M. **j**, AdvA-GFP localizes to mid-cell at sites of cell division. WT *A. baumannii* harboring *T5lacP-advA-gfp* was cultured to mid-log phase with 50  $\mu$ M IPTG and imaged by phase-contrast microscopy and fluorescence microscopy for detection of GFP signal. Scale bar, 5  $\mu$ M.

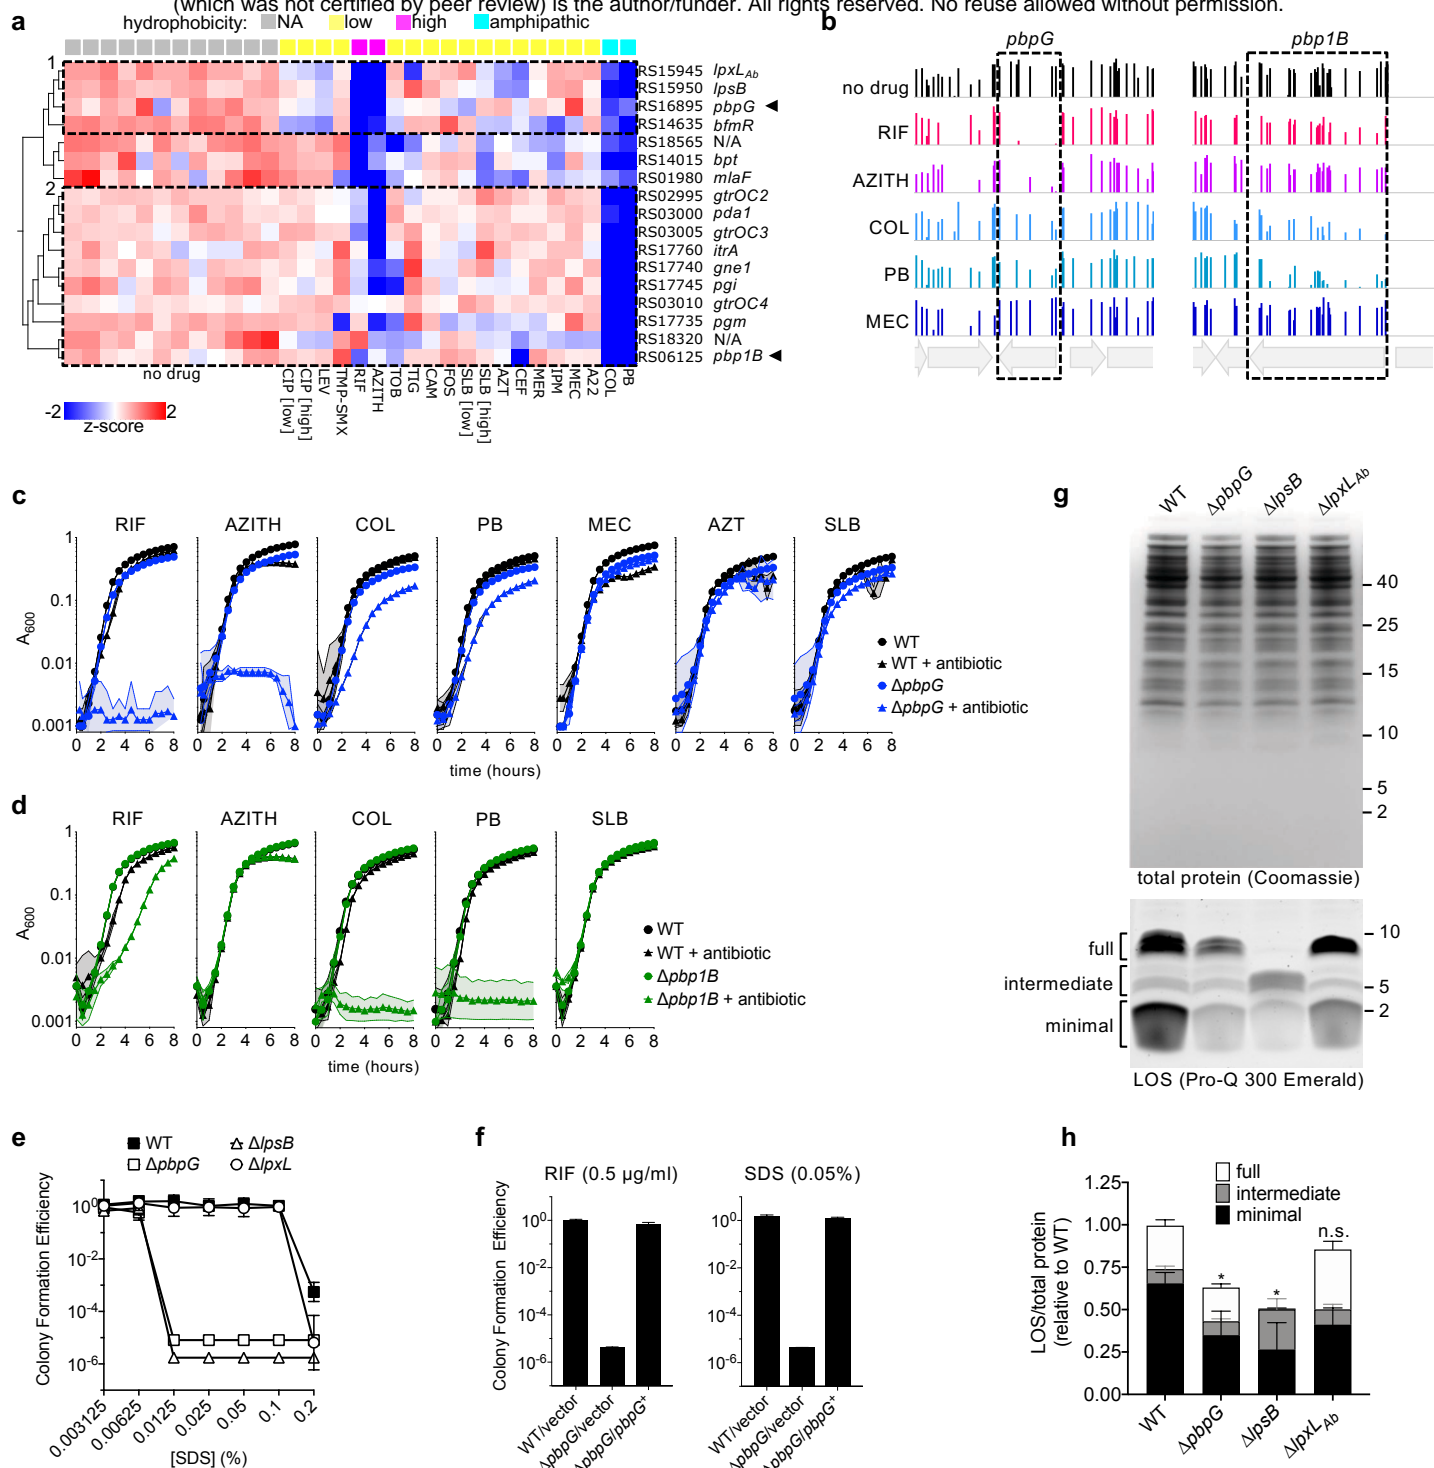

**Fig. 4. Clustering of Tn-seq fitness signatures defined by hydrophobic compound sensitivity reveals contribution of *pbpG* (PBP 7/8) to LOS synthesis.** **a**, Fitness profile clusterogram of genes for which knockout causes preferential but differing hypersensitivity to hydrophobic (RIF, AZITH) and amphipathic (COL, PB) antibiotics. Tn-seq data were subjected to PCA to identify discriminating genes whose fitness values differed as a function of hydrophobicity annotation [high,  $xlogp3 \geq 4$ ; low,  $xlogp3 < 4$ ; amphipathic, polymyxin antimicrobial peptides; NA, not applicable (no drug); Supplementary Table 1] (ANOVA,  $q = 0.0003$ ). Heatmap shows normalized fitness values in z-scored units. Dashed boxes indicate clusters of phenotypic signatures defined by differential defects with hydrophobic and amphipathic drugs. Arrows highlight cell-wall enzymes that cluster with distinct surface polysaccharide synthesis pathways. **b**, Bars show fitness values of individual transposon mutants at each locus across all tested banks as in Fig. 3. **c,d**, Validation of Tn-seq selective drug hypersensitivities using independent cultures of defined deletion mutants  $\Delta pbpG$  (c) or  $\Delta pbp1B$  (d) vs isogenic WT. Data points show geometric mean  $\pm$  s.d. ( $n = 3$ ) as in Fig. 3. **e**,  $\Delta pbpG$  strain shows detergent hypersensitivity phenotype matching that of mutant lacking the *lpsB* LOS glycosyltransferase. Data points show geometric mean CFE  $\pm$  s.d. ( $n = 4$ ). **f**, Reintroduction of *pbpG* reverses hypersusceptibility to RIF and SDS. Strains harbored vector (pYDE153) or vector containing *pbpG* (pYDE210). Bars show geometric mean CFE  $\pm$  s.d. ( $n = 3$ ). **g,h**, *pbpG* knockout results in reduced LOS levels. **g**, LOS (bottom) and total protein (top) were detected in cell lysates separated by SDS-PAGE. **h**, LOS levels in regions indicated in g were normalized to total protein content. Values are shown relative to total normalized LOS levels in WT. Bars show mean  $\pm$  s.d. ( $n \geq 5$ ). Total normalized LOS levels of each mutant were compared to WT by 2-way ANOVA with Dunnett's multiple comparisons test. \*,  $p < 0.0001$ ; n.s., not significant ( $p = 0.1652$ ).

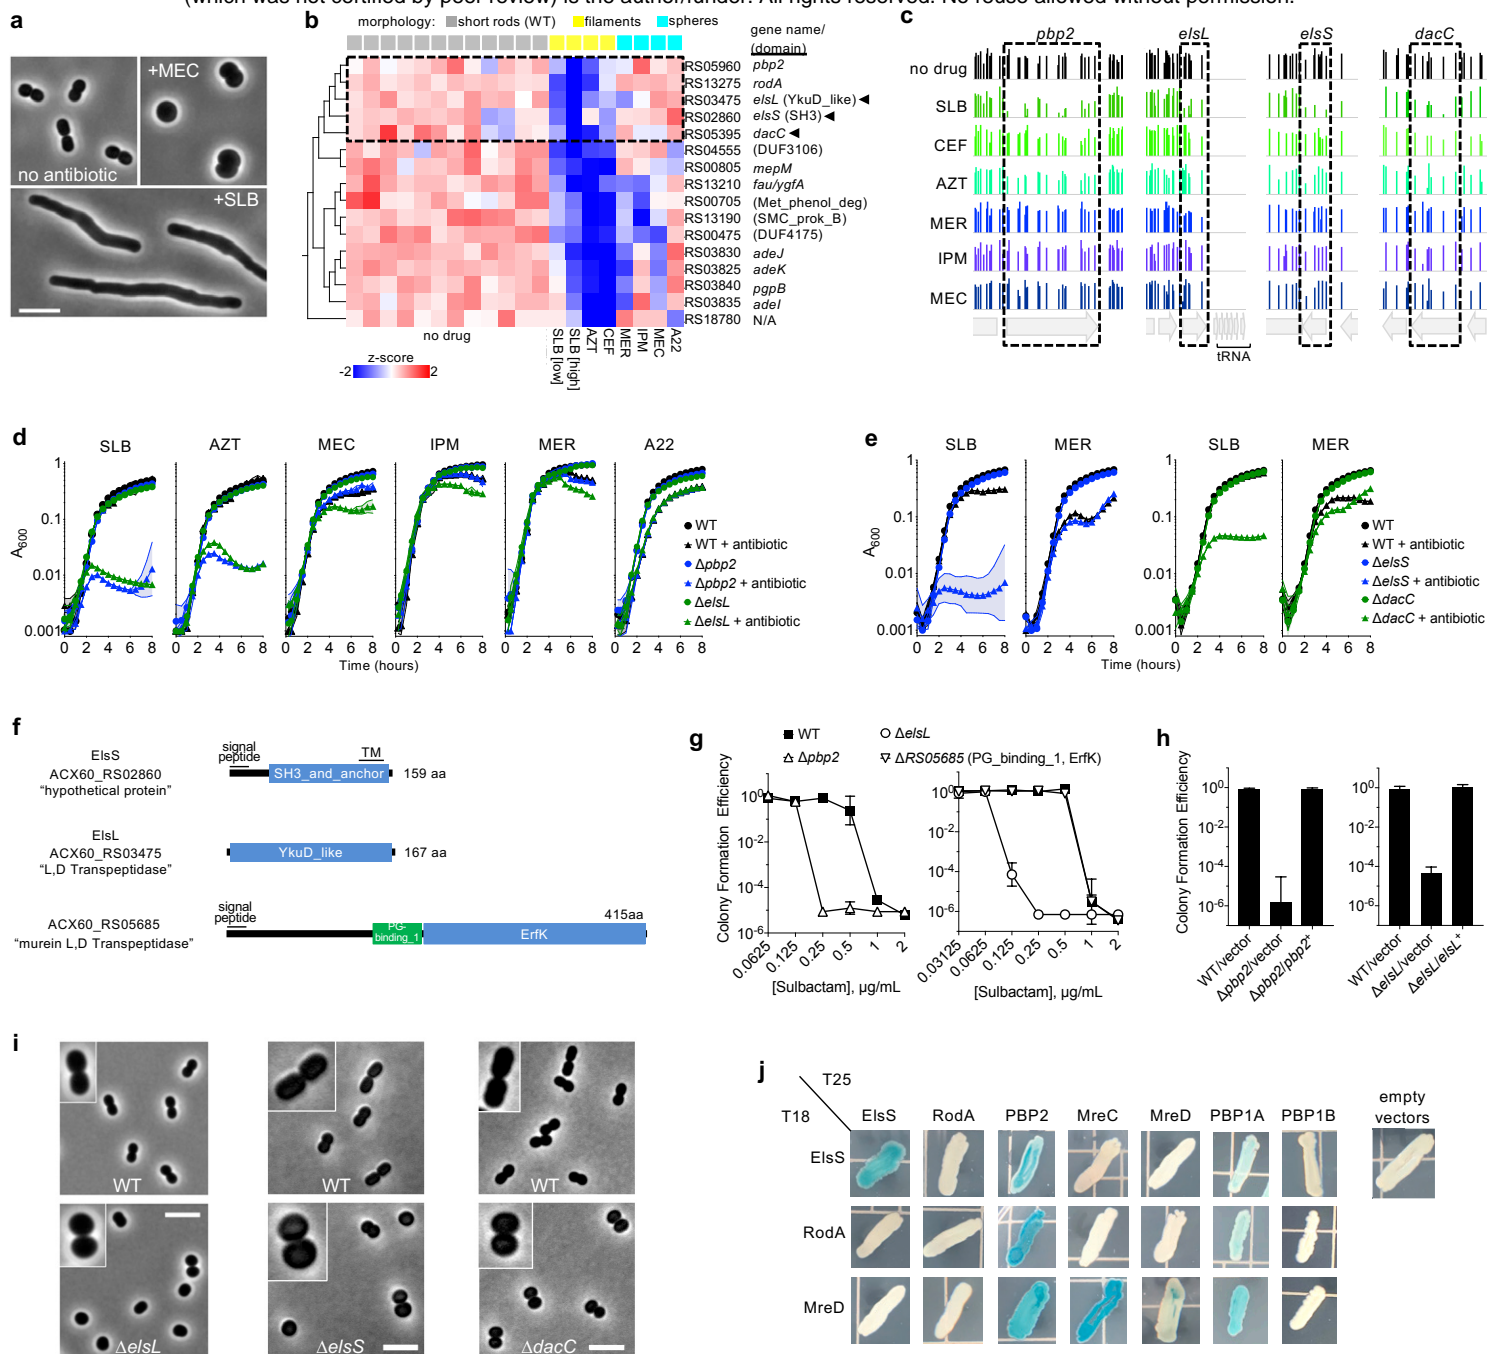

**Fig. 5. Morphology-specific susceptibility signatures uncover role of Rod-system in defense against divisome stress and reveal novel rod shape determinants.** **a**, Exposure of *A. baumannii* to different  $\beta$ -lactam antibiotics at sub-MIC causes target-specific morphotypes. SLB (0.25  $\mu\text{g/ml}$ ) causes growth as extended rods. CEF and AZT cause a similar filamentous morphology. MEC (16  $\mu\text{g/ml}$ ) causes loss of rod shape. IPM and A22 cause a similar spheroid morphology. Images were acquired with phase-contrast. Scale bar, 5  $\mu\text{m}$ . **b**, Tn-seq fitness clusterogram showing subset of genes for which inactivation causes selective hypersensitivity to antibiotics causing filamentation vs sphere formation. Tn-seq data from the indicated conditions were subjected to PCA using morphology annotations (indicated above the heatmap) to identify the discriminating genes whose fitness is significantly different with cell wall perturbations causing filamentation compared to other conditions (t-test,  $q = 0.025$ ). Heatmap shows normalized fitness in z-scored units. Dashed box indicates cluster of canonical Rod-system genes with three uncharacterized genes (arrowheads). **c**, Fitness values of individual transposon mutants at each locus across all banks as in Fig. 3. **d,e**, Validation of Tn-seq hypersensitivities using independent cultures of deletion mutants compared to WT. Data points show geometric mean  $\pm$  s.d. ( $n = 3$ ) as in Fig. 3. **f**, Domain and topology predictions in the indicated proteins based on CDD<sup>36</sup>, SignalP-5.0<sup>76</sup>, and Phobius<sup>77</sup>. ElsL does not contain a predicted signal peptide. NCBI locus tag and protein annotation are listed. **g**, SLB susceptibility on solid medium was analyzed via CFE assay. Data points show geometric mean  $\pm$  s.d. (left,  $n = 3$ ; right,  $n = 4$ ). **h**, CFE with SLB (0.25  $\mu\text{g/ml}$ ) vs no drug was measured with strains harboring vector (pEGE305) or vector containing *pbp2* (pYDE135) or *elsL* (pEGE308). Bars show geometric mean  $\pm$  s.d. (left,  $n = 4$ ; right,  $n = 3$ ). **i**, ElsL, ElsS, and DacC determine Rod shape. Mutants (bottom) and WT control (top) grown without antibiotics to mid-log phase were imaged by phase contrast microscopy. Scale bar, 5  $\mu\text{m}$ . Insets show 2x-magnified views of representative bacteria. **j**, Two-hybrid interactions of ElsS and Rod-system proteins. Proteins fused to a T25 or T18 CyaA fragment were tested in *E. coli* for LacZ reporter activity on X-gal plates.

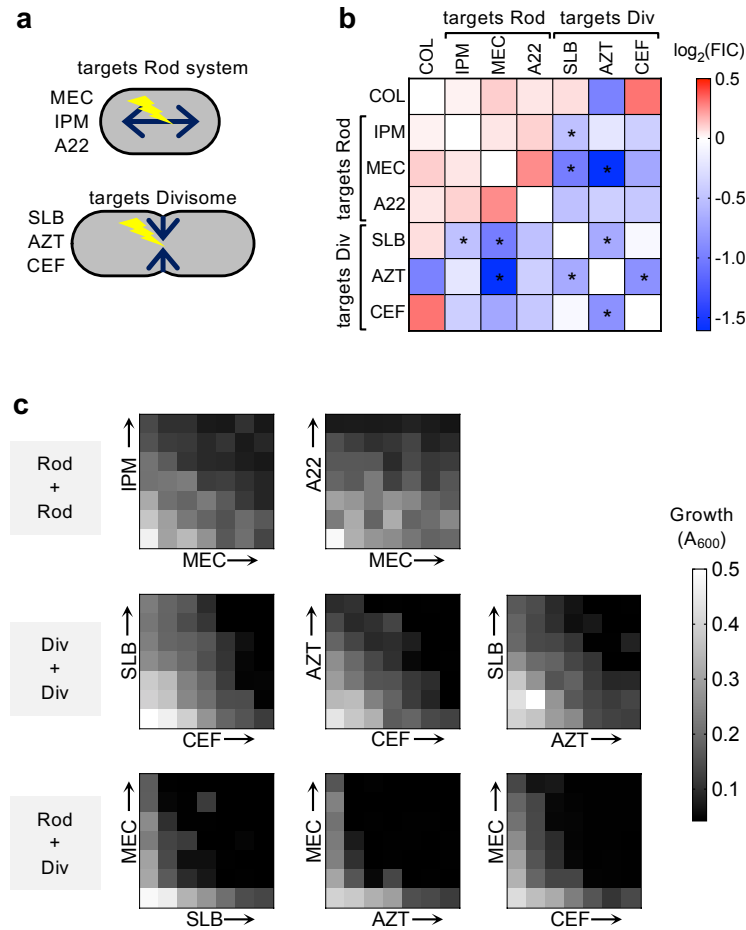

**Fig. 6. Synergistic inhibition of *A. baumannii* resulting from paired treatment with Rod-system-targeting and Divisome-targeting antibiotics.** **a**, Diagrams showing the two modes of cell wall growth in rod-shaped bacteria which are governed by distinct biosynthesis systems (Rod-system vs divisome). Listed next to each diagram is the subset of antibiotics that preferentially target the respective PG synthesis system. **b**, Heat map shows average Log<sub>2</sub>FIC scores resulting from pairwise interactions among 7 antibiotics via the diagonal sampling method from  $n = 2$  independent determinations. Blue indicates synergistic pairs, white indicates additive pairs, and red indicates antagonistic pairs. \*, average Log<sub>2</sub>FIC was significantly different from 0 in one-sample t test ( $p < 0.05$ ). **c**, Validation of drug-drug interactions via checkerboard assay. Heat map shows bacterial growth in microtiter wells containing no drug (lower left wells) or increasing amounts of each drug alone or in pairwise combinations. Drug concentrations increase linearly from left to right along x-axis, and bottom to top along y-axis. “Div” refers to Divisome, “Rod” refers to Rod-system.
